# Supplementary material for: Long-term thermal history, not short-term exposure to different variability regimes, drives heatwave tolerance in key reef calcifiers
Source: Research Square preprint supplement (doi:10.21203/rs.3.rs-7647146/v1), 2025-10-16
Supplement: Supplementary file 1 [file 01c9327e49dc602b574ec3bb.pdf]

## Supplementary Information

**Table S1.** Mean day and night temperatures in the different treatments and experimental phases. Note: Treatment “31\_Day” only comprised of 2 tanks. Also, temperatures recorded in the transition phase (7 am – 8 am and 7 pm – 8 pm) during which temperatures were changed manually (see Fig. S2) were excluded from this analysis. Additionally, the impact phase only represents temperatures recorded at the peak of the heatwaves (see Fig. S2) as we excluded the on- and offset period (~2 weeks each).

| Treatment | Day/Night | Experimental period | Temperature (°C) ± SE | n       |
|-----------|-----------|---------------------|-----------------------|---------|
| 31        | Day       | pre-impact          | 31.65 ± 0.01          | 4752.00 |
|           | Night     | pre-impact          | 31.63 ± <0.01         | 4644.00 |
|           | Day       | impact              | 31.62 ± <0.01         | 3168.00 |
|           | Night     | impact              | 31.57 ± <0.01         | 3168.00 |
|           | Day       | recovery            | 31.62 ± <0.01         | 4356.00 |
|           | Night     | recovery            | 31.57 ± <0.01         | 4356.00 |
| 31_Day    | Day       | pre-impact          | 33.26 ± 0.02          | 3168.00 |
|           | Night     | pre-impact          | 30.23 ± 0.01          | 3096.00 |
|           | Day       | impact              | 33.42 ± 0.01          | 2112.00 |
|           | Night     | impact              | 30.23 ± 0.01          | 2112.00 |
|           | Day       | recovery            | 33.28 ± 0.01          | 2904.00 |
|           | Night     | recovery            | 30.30 ± 0.01          | 2904.00 |
| 31_Night  | Day       | pre-impact          | 30.45 ± 0.01          | 4752.00 |
|           | Night     | pre-impact          | 33.43 ± 0.01          | 4644.00 |
|           | Day       | impact              | 30.36 ± 0.01          | 3168.00 |
|           | Night     | impact              | 33.36 ± <0.01         | 3168.00 |
|           | Day       | recovery            | 30.49 ± 0.01          | 4356.00 |
|           | Night     | recovery            | 33.31 ± 0.01          | 4356.00 |
| 34        | Day       | pre-impact          | 31.79 ± 0.01          | 4752.00 |
|           | Night     | pre-impact          | 31.81 ± 0.01          | 4644.00 |
|           | Day       | impact              | 34.80 ± <0.01         | 3168.00 |
|           | Night     | impact              | 34.76 ± <0.01         | 3168.00 |
|           | Day       | recovery            | 31.87 ± <0.01         | 2904.00 |
|           | Night     | recovery            | 31.55 ± 0.06          | 2904.00 |
| 34_Day    | Day       | pre-impact          | 32.95 ± 0.01          | 4752.00 |
|           | Night     | pre-impact          | 30.07 ± <0.01         | 4644.00 |
|           | Day       | impact              | 35.97 ± 0.01          | 3168.00 |
|           | Night     | impact              | 33.16 ± 0.01          | 3168.00 |
|           | Day       | recovery            | 33.18 ± <0.01         | 4356.00 |
|           | Night     | recovery            | 30.19 ± 0.06          | 4356.00 |
| 34_Night  | Day       | pre-impact          | 30.73 ± 0.01          | 4752.00 |
|           | Night     | pre-impact          | 33.62 ± <0.01         | 4644.00 |
|           | Day       | impact              | 33.16 ± 0.01          | 3168.00 |
|           | Night     | impact              | 36.48 ± <0.01         | 3168.00 |
|           | Day       | recovery            | 30.49 ± 0.01          | 4356.00 |
|           | Night     | recovery            | 33.32 ± 0.01          | 4356.00 |

**Tables S2.** Mean duration, average, maximum, cumulative intensity, onset and number of events within each strength category of historic and contemporary marine heatwaves at Al-Fahal (climatological period 1982-01-01–2012-01-01).

| Mean duration (d) | Mean average intensity (°C) | Mean Maximum intensity (°C) | Mean cumulative intensity (°C d) | Mean onset (°C d <sup>-1</sup> ) | Events Cat. I (n) | Events Cat. II (n) | Events Cat. III (n) | Events Cat. VI (n) |
|-------------------|-----------------------------|-----------------------------|----------------------------------|----------------------------------|-------------------|--------------------|---------------------|--------------------|
| 13.67             | 1.43                        | 1.78                        | 20.28                            | 0.22                             | 93                | 17                 | 0                   | 0                  |

**Table S3.** Intensity metrics, duration, and rate of onset of the simulated marine heatwave. Calculation is based on mean August climatology and the data from the actual experimental tanks (Fig. S7) but only from tanks assigned to the heatwave/no-variability treatment. Adjusted climatology and thresholds include a 0.7 °C bias-adjustment based on the mean annual offset we observed between in-situ loggers and satellite data (Fig. S5). Note: Maximum monthly mean (30.76 °C) and the respective coral bleaching thresholds (MMM + 1 °C) was obtained directly from Coral Reef Watch. Bias adjustment was performed by adding 0.7 °C to the bleaching threshold but since the satellite product differs from the one, we used for the calculation of the regional heatwaves (OISST v2.1) the respective offset is likely different.

| Threshold  | Duration (d) | Maximum intensity (°C) relative to climatology | Mean intensity (°C) relative to climatology | Cumulative intensity (°C d) relative to climatology | Degree Heating Week (°C week) | Onset (°C d <sup>-1</sup> ) |
|------------|--------------|------------------------------------------------|---------------------------------------------|-----------------------------------------------------|-------------------------------|-----------------------------|
| Unadjusted | 37           | 3.77                                           | 2.83                                        | 104.84                                              | 10.87                         | 0.17                        |
| Adjusted   | 30           | 3.07                                           | 2.41                                        | 74.42                                               | 7.11                          | 0.16                        |

**Table S4.** Strength category of the simulated heatwave. Calculation is based on average August climatology and the data from the actual experimental tanks (Fig. S7) but only from tanks assigned to the heatwave/no-variability treatment. Adjusted climatology and thresholds include a 0.7 °C bias-adjustment based on the mean annual offset we observed between in-situ loggers and satellite data (Fig. S5).

| Threshold  | Category   | Days over 1 <sup>st</sup> thresh. (%) | Days over 2 <sup>nd</sup> thresh. (%) | Days over 3 <sup>rd</sup> thresh. (%) | Days over 4 <sup>th</sup> thresh. (%) |
|------------|------------|---------------------------------------|---------------------------------------|---------------------------------------|---------------------------------------|
| Unadjusted | III Severe | 27                                    | 30                                    | 43                                    | 0                                     |
| Adjusted   | III Severe | 27                                    | 43                                    | 30                                    | 0                                     |

**Table S5.** Total number of samples available for each species in each experimental phase.

| Timepoint                      | Treatment | <i>Lithophyllum</i> sp. | <i>Neogoniolithon</i> sp. | <i>H. opuntia</i> | <i>H. discoidea</i> |
|--------------------------------|-----------|-------------------------|---------------------------|-------------------|---------------------|
| Experiment start               | 34        | 16                      | 15                        | 15                | 13                  |
|                                | 34_Day    | 15                      | 15                        | 15                | 15                  |
|                                | 34_Night  | 14                      | 15                        | 15                | 15                  |
|                                | 31_Day    | 15                      | 15                        | 15                | 15                  |
|                                | 31_Night  | 15                      | 14                        | 15                | 15                  |
|                                | 31        | 15                      | 16                        | 15                | 14                  |
| End of pre-impact/Start of MHW | 34        | 15                      | 13                        | 13                | 11                  |
|                                | 34_Day    | 15                      | 15                        | 13                | 13                  |
|                                | 34_Night  | 15                      | 15                        | 14                | 14                  |
|                                | 31_Day    | 10                      | 8                         | 6                 | 9                   |
|                                | 31_Night  | 15                      | 14                        | 13                | 12                  |
|                                | 31        | 15                      | 15                        | 12                | 13                  |
| End of MHW/Start of recovery   | 34        | 15                      | 13                        | 8                 | 8                   |
|                                | 34_Day    | 15                      | 15                        | 7                 | 10                  |
|                                | 34_Night  | 15                      | 15                        | 4                 | 10                  |
|                                | 31_Day    | 10                      | 8                         | 3                 | 7                   |
|                                | 31_Night  | 15                      | 14                        | 10                | 7                   |
|                                | 31        | 15                      | 14                        | 8                 | 8                   |
| End recovery                   | 34        | 15                      | 13                        | 6                 | 4                   |
|                                | 34_Day    | 15                      | 15                        | 7                 | 8                   |
|                                | 34_Night  | 15                      | 15                        | 2                 | 6                   |
|                                | 31_Day    | 10                      | 8                         | 2                 | 5                   |
|                                | 31_Night  | 15                      | 14                        | 8                 | 6                   |
|                                | 31        | 15                      | 15                        | 7                 | 5                   |

**Table S6.** Mean dissolved inorganic carbon (DIC) and pH on the total scale in the different treatments. Samples for DIC analysis and measurements of pH and were taken in all experimental phases (pre-impact, impact, recovery) from all tanks both during the day and night to capture both the long- and the short-term variability of these parameters. Note: Treatment “31\_Day” only comprised of 2 tanks.

| Treatment | DIC ( $\mu\text{mol kg}^{-1}$ ) $\pm$ SE | pH <sub>T</sub> $\pm$ SE | n  |
|-----------|------------------------------------------|--------------------------|----|
| 31        | 1974.32 $\pm$ 5.71                       | 7.97 $\pm$ 0.01          | 27 |
| 31_Day    | 1974.13 $\pm$ 6.04                       | 7.96 $\pm$ 0.01          | 18 |
| 31_Night  | 1973.88 $\pm$ 5.15                       | 7.98 $\pm$ 0.01          | 27 |
| 34        | 1974.31 $\pm$ 4.58                       | 7.96 $\pm$ 0.01          | 27 |
| 34_Day    | 1966.88 $\pm$ 5.52                       | 7.96 $\pm$ 0.01          | 27 |
| 34_Night  | 1970.90 $\pm$ 4.96                       | 7.97 $\pm$ 0.01          | 27 |

**Table S7.** Mean daily light dose in the different treatments. Treatment averages taken from doses calculated for 61 days for each of the three experimental tanks that comprised each treatment. Photoperiod was from 7 am to 7 pm. Data was obtained using PAR loggers placed in each tank. Loggers were calibrated against a handheld PAR meter (Apogee MQ-510) and logging interval was set to 5 min. Note: Treatment “31\_Day” only comprised of 2 tanks. Loggers were placed into the experimental tanks one week after the start of the experiment.

| Treatment | n   | Daily dose ( $\text{mol m}^{-2} \text{d}^{-1}$ ) $\pm$ SE | max PAR ( $\mu\text{mol m}^{-2} \text{s}^{-1}$ ) $\pm$ SE |
|-----------|-----|-----------------------------------------------------------|-----------------------------------------------------------|
| 34        | 172 | $2.54 \pm 0.02$                                           | $113.3 \pm 0.99$                                          |
| 34_Day    | 183 | $2.35 \pm 0.03$                                           | $105.1 \pm 1.24$                                          |
| 34_Night  | 183 | $2.63 \pm 0.04$                                           | $118.3 \pm 1.78$                                          |
| 31        | 183 | $2.58 \pm 0.03$                                           | $114.9 \pm 1.15$                                          |
| 31_Day    | 122 | $2.78 \pm 0.04$                                           | $125.9 \pm 1.83$                                          |
| 31_Night  | 183 | $2.75 \pm 0.02$                                           | $123.2 \pm 1.12$                                          |

**Table S8.** Mean daily light dose and mean maximum PAR in the different treatment tanks. Photoperiod was from 7 am to 7 pm. Data was obtained using PAR loggers placed in each tank. Loggers were calibrated against a handheld PAR meter (Apogee MQ-510) and logging interval was set to 5 min. Note: Treatment “31\_Day” only comprised of 2 tanks. Loggers were placed into the experimental tanks one week after the start of the experiment.

| Treatment | Tank | n  | Daily dose ( $\text{mol m}^{-2} \text{d}^{-1}$ ) $\pm$ SE | max PAR ( $\mu\text{mol m}^{-2} \text{s}^{-1}$ ) $\pm$ SE |
|-----------|------|----|-----------------------------------------------------------|-----------------------------------------------------------|
| 31        | 1    | 61 | $2.54 \pm 0.01$                                           | $114.4 \pm 0.53$                                          |
| 34        | 2    | 61 | $2.47 \pm 0.02$                                           | $108.9 \pm 0.73$                                          |
| 34_Day    | 3    | 61 | $2.26 \pm 0.04$                                           | $100.0 \pm 1.93$                                          |
| 31_Day    | 4    | 61 | $2.59 \pm 0.07$                                           | $116.6 \pm 2.97$                                          |
| 34_Night  | 5    | 61 | $2.51 \pm 0.10$                                           | $112.5 \pm 4.21$                                          |
| 31_Night  | 6    | 61 | $2.86 \pm 0.03$                                           | $128.1 \pm 1.19$                                          |
| 31_Night  | 8    | 61 | $2.61 \pm 0.05$                                           | $115.3 \pm 2.12$                                          |
| 34_Night  | 9    | 61 | $2.44 \pm 0.05$                                           | $110.3 \pm 2.32$                                          |
| 34        | 10   | 50 | $2.21 \pm 0.04$                                           | $101.3 \pm 1.43$                                          |
| 34_Day    | 11   | 61 | $2.22 \pm 0.04$                                           | $99.8 \pm 1.95$                                           |
| 31        | 12   | 61 | $2.34 \pm 0.04$                                           | $103.2 \pm 2.02$                                          |
| 34_Night  | 13   | 61 | $2.93 \pm 0.02$                                           | $131.9 \pm 1.06$                                          |
| 31        | 14   | 61 | $2.86 \pm 0.04$                                           | $126.9 \pm 1.72$                                          |
| 34        | 15   | 61 | $2.86 \pm 0.01$                                           | $127.7 \pm 0.47$                                          |
| 31_Night  | 16   | 61 | $2.78 \pm 0.04$                                           | $126.2 \pm 2.00$                                          |
| 31_Day    | 17   | 61 | $2.98 \pm 0.03$                                           | $135.2 \pm 1.34$                                          |
| 34_Day    | 18   | 61 | $2.56 \pm 0.04$                                           | $115.6 \pm 1.93$                                          |

**Table S9.** Daily light dose and mean maximum photosynthetic active radiation (PAR) at Al-Fahal in three different microhabitats.

| Location | Mean light dose $\pm$ SE | Mean maximum PAR $\pm$ SE | n  |
|----------|--------------------------|---------------------------|----|
| Cave     | $0.75 \pm 0.02$          | $30.02 \pm 0.65$          | 57 |
| Crevice  | $2.58 \pm 0.23$          | $191.45 \pm 18.83$        | 57 |
| Flat     | $41.54 \pm 1.16$         | $1737.02 \pm 39.61$       | 57 |

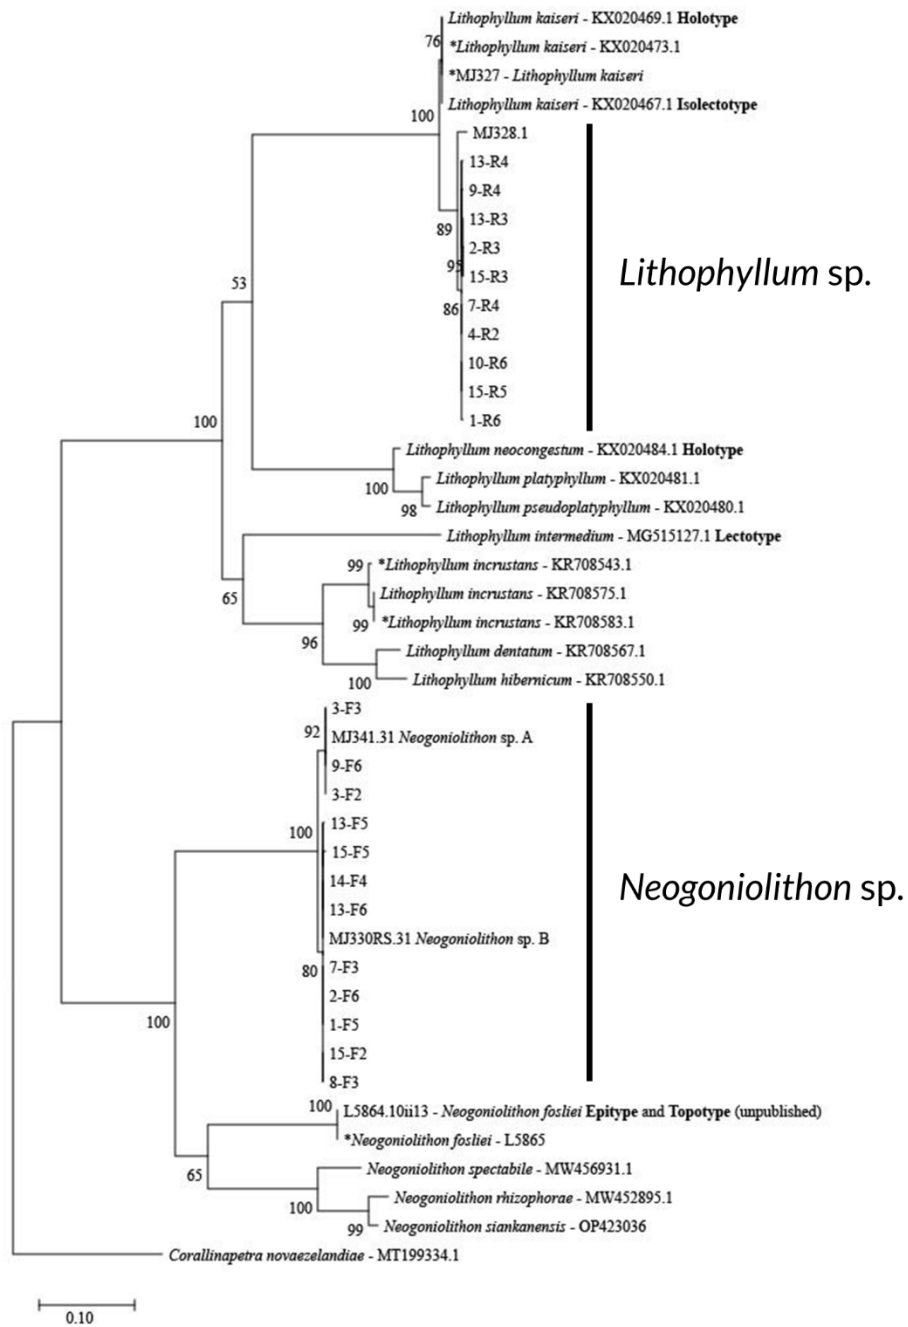

**Figure S1.** Taxonomic tree with samples from previous collections of the same morphologies of crustose coralline algae used in this study from the same sampling site.

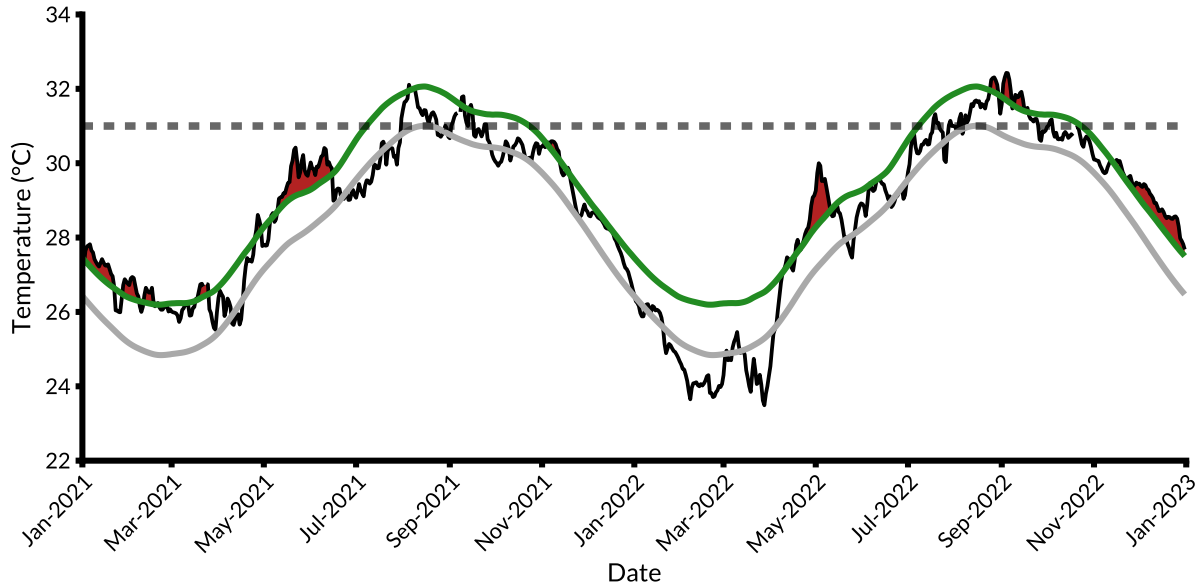

**Figure S2.** Local climatology (grey line), temperature threshold (green line) and satellited derived sea surface temperature (black line) at Al-Fahal in the period between January 2021 and 2023. Climatology based on the time between 1982-01-01 and 2012-01-01. Marine heatwaves (i.e., temperatures above the 90<sup>th</sup> percentile persisting for  $\geq 5$  days) are highlighted in red. Dashed line indicates the maximum monthly mean at the collection site (August long-term mean 30.93 °C).

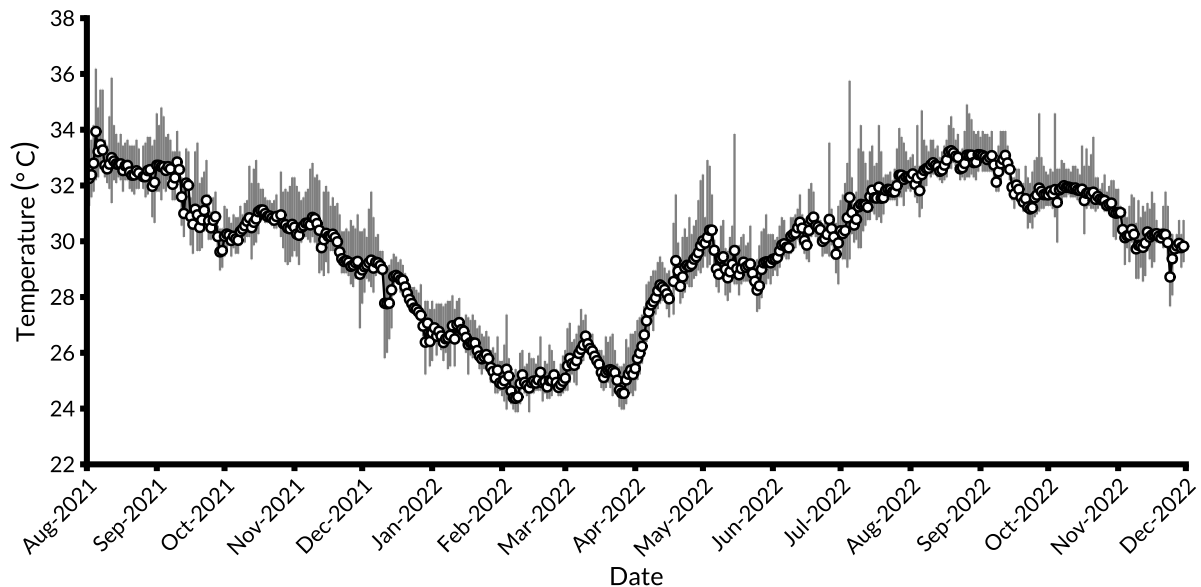

**Figure S3.** Mean (points) daily and minimum and maximum (grey bars) temperatures recorded at Al-Fahal reef by in-situ temperature loggers (SBE 56, Sea-Bird Scientific, USA). Sampling interval was set to 10 minutes and sampling period was between August 2021 and December 2022.

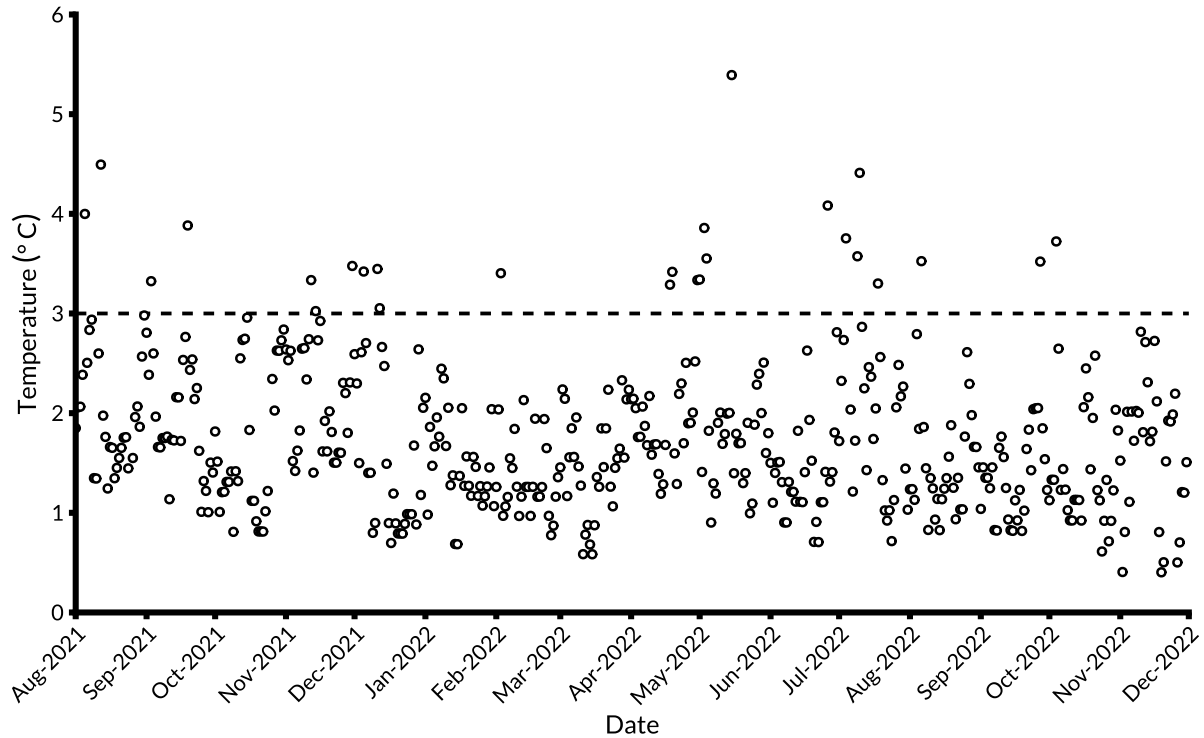

**Figure S4.** Daily absolute variability (maximum minus minimum recorded daily temperature) at Al-Fahal reef calculated from in-situ logger recordings (SBE 56, Sea-Bird Scientific, USA). Sampling period was between August 2021 and December 2022 and logging interval was set to 10 minutes. Dashed line indicates 3 °C, equivalent to the variability in the designed experiment. Mean variability at the site 1.73 °C.

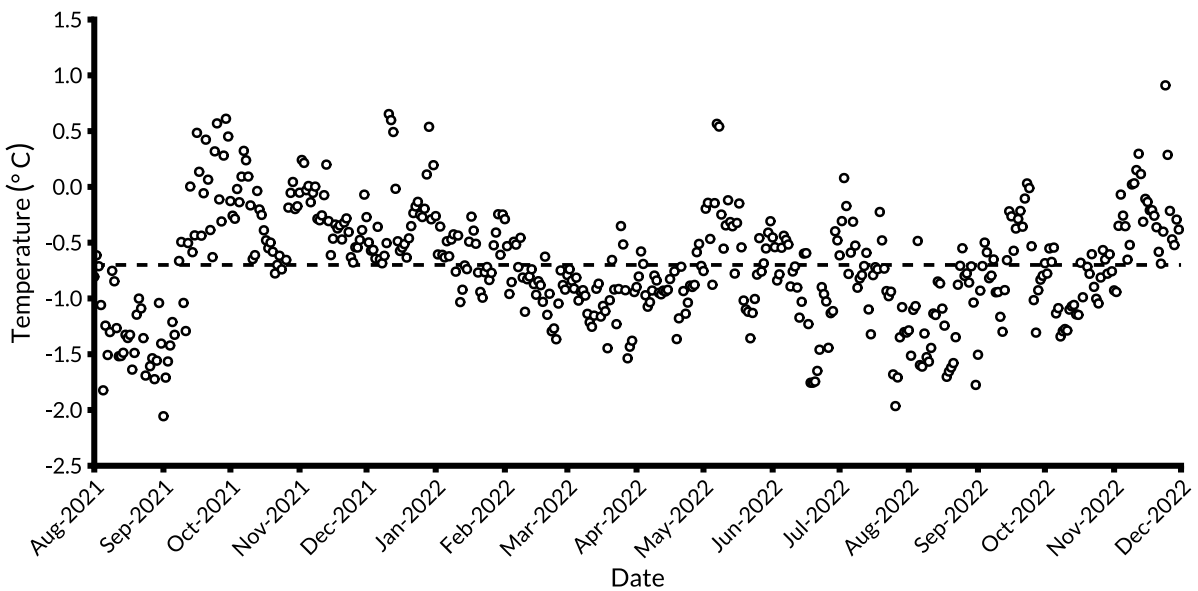

**Figure S5.** Temperature discrepancy between in-situ loggers (SBE 56, Sea-Bird Scientific, USA) and satellite derived sea surface temperature (OISST v2.1) shown as the overall difference in daily

means, with negative values indicating that satellite-derived SST is lower than logger temperatures. Dashed line indicates mean bias ( $-0.70^{\circ}\text{C}$ ). Loggers were set to record every 10 minutes and sampling period was between August 2021 and December 2022.

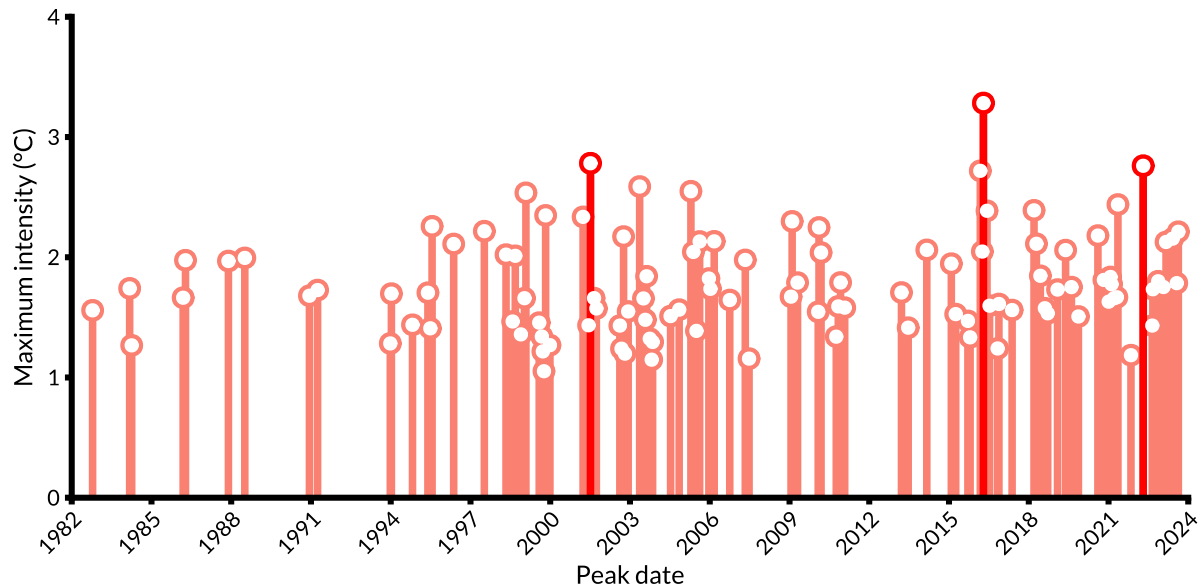

**Figure S6.** Maximum intensity of past MHWs at Al-Fahal calculated from satellite derived sea surface temperatures (OISST v2.1) and using a climatology based on the time between 1982-01-01 and 2012-01-01. Strongest three events in darker red. Maximum intensity of the simulated MHW was  $3^{\circ}\text{C}$ .

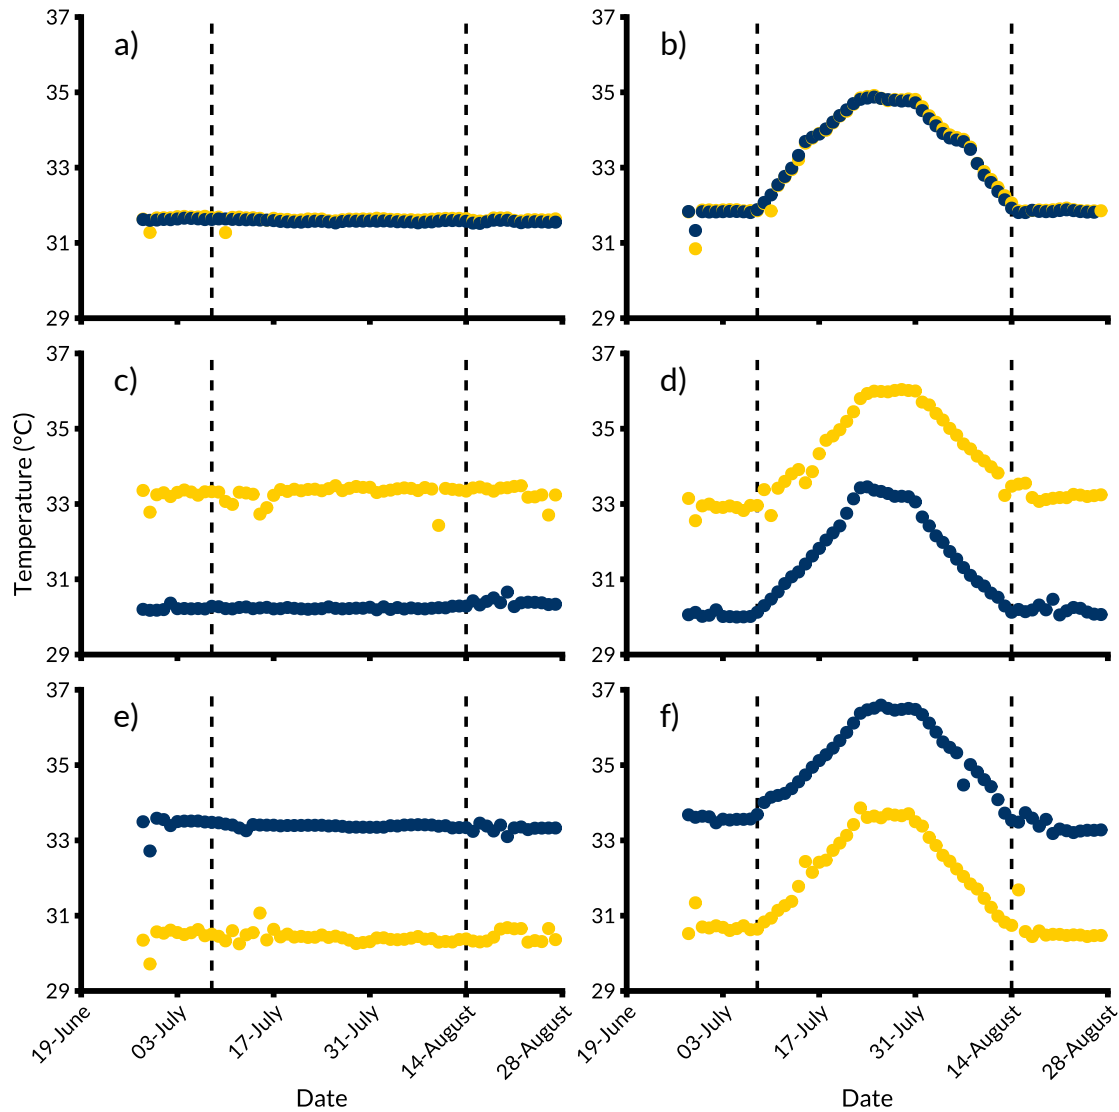

**Figure S7.** Mean day (yellow) and night (blue) temperatures in the six treatments (“31” = a; “34” = b; “31\_Day” = c; “34\_Day” = d; “31\_Night” = e and “34\_Night” = f). Dots represent mean temperatures and error bars the standard error. Dashed lines indicate the start and end of the impact phase which was preceded by the pre-impact and followed by the recovery phase. Means and standard errors for both day and night are calculated from 396 individual data points for each day/night taken from the 3 loggers that were placed in each tank of each treatment. Exceptions are only the first night (2023-06-28, n = 288) as the newly introduced loggers were set to start logging at 3 am and the treatment “31\_Day” (middle-left) that comprised of two tanks only (n = 264). Logging interval was set to 5 min. Note: The times between 7 to 8 am and 7 to 8 pm were excluded from the calculation of the means as during these times the manual temperature changes occurred.

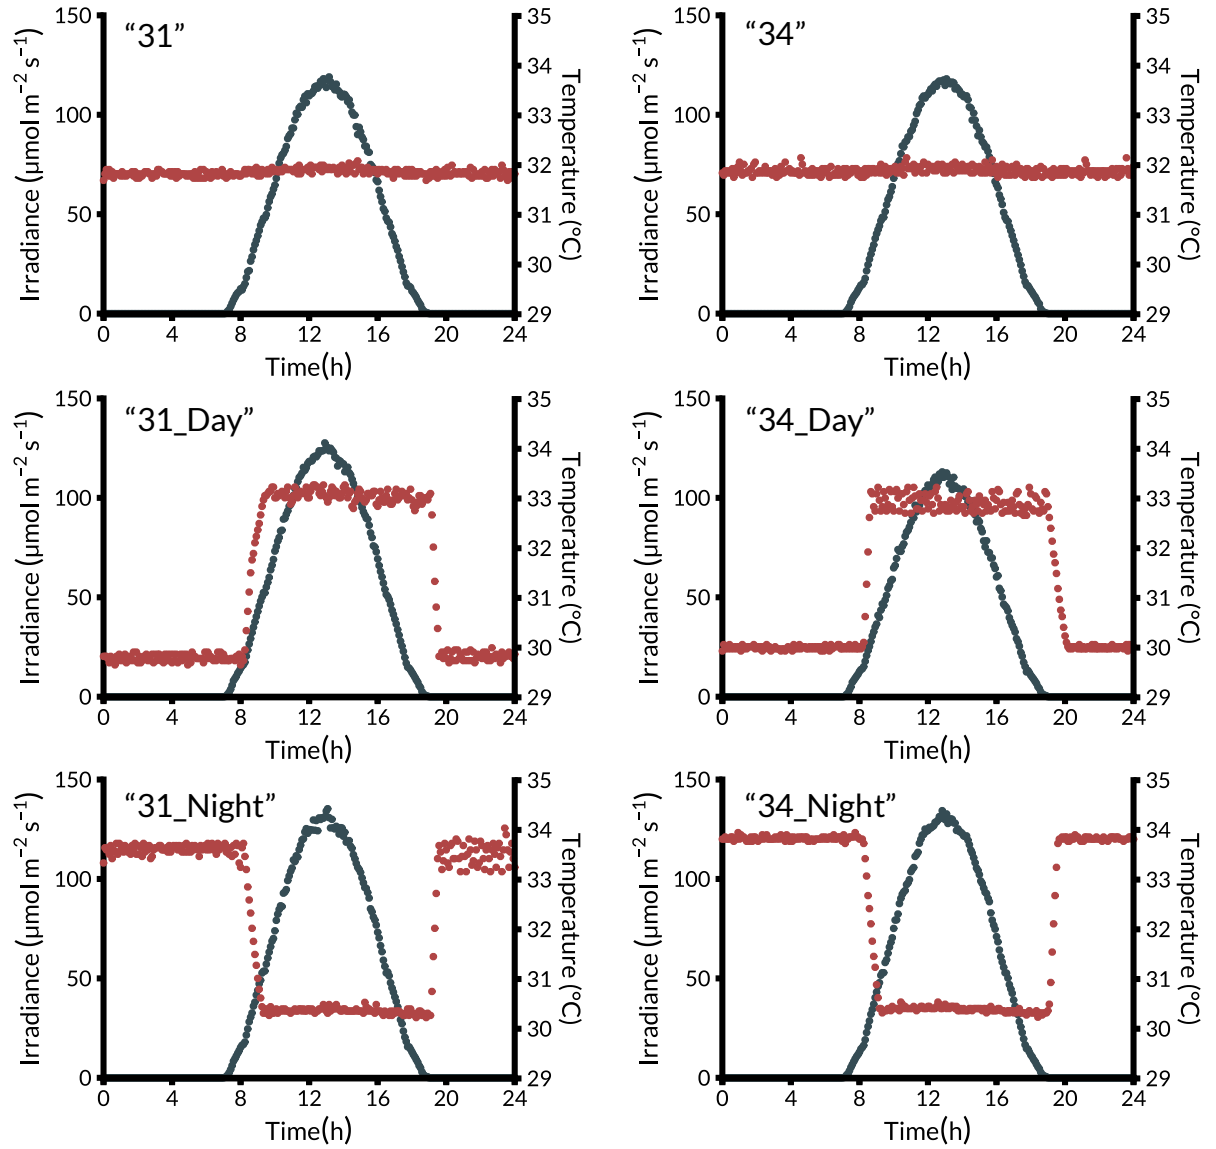

**Figure S8.** Temperatures (red) and irradiances (grey) on 30<sup>th</sup> June 2023 (pre-impact phase) in the experimental tanks one to six, each belonging to a different treatment. Dots indicate individual data points from loggers. Logging interval was set to 5 minutes.

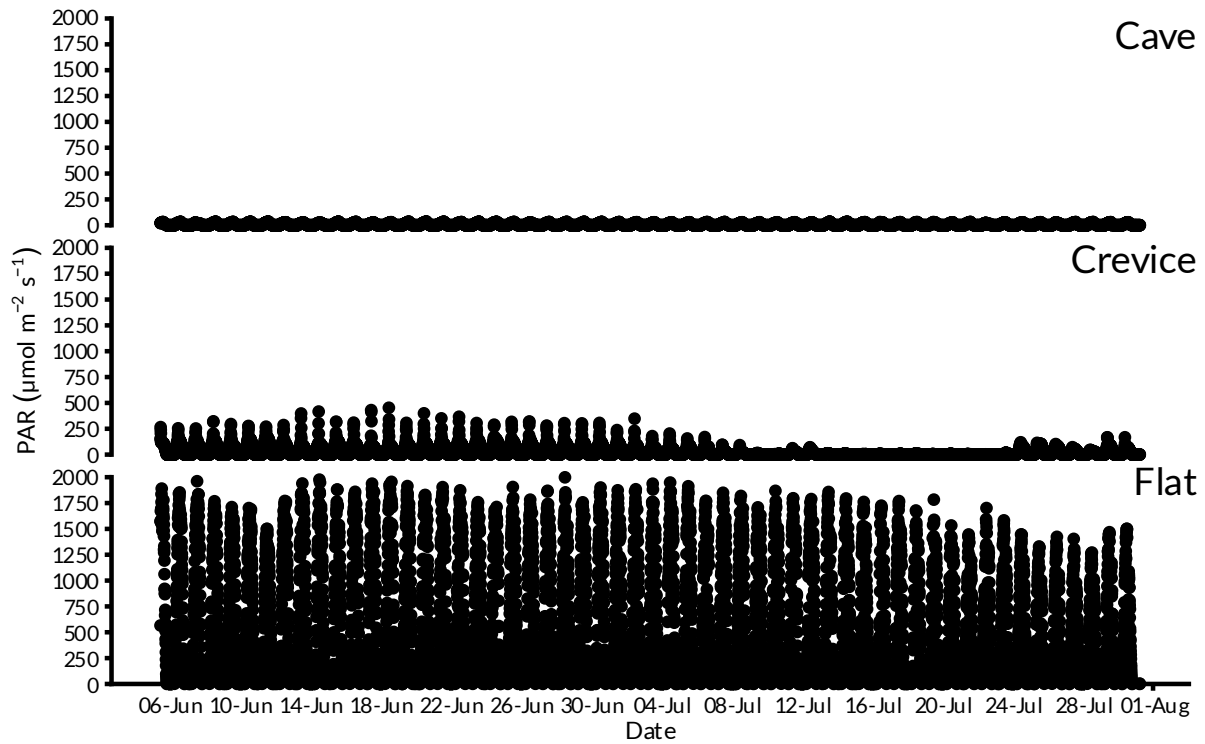

**Figure S9.** Diel photosynthetic active radiation (PAR) at Al-Fahal in three different microhabitats: a "cave" in the reef framework (top), a crevice (middle) and the flat (bottom).

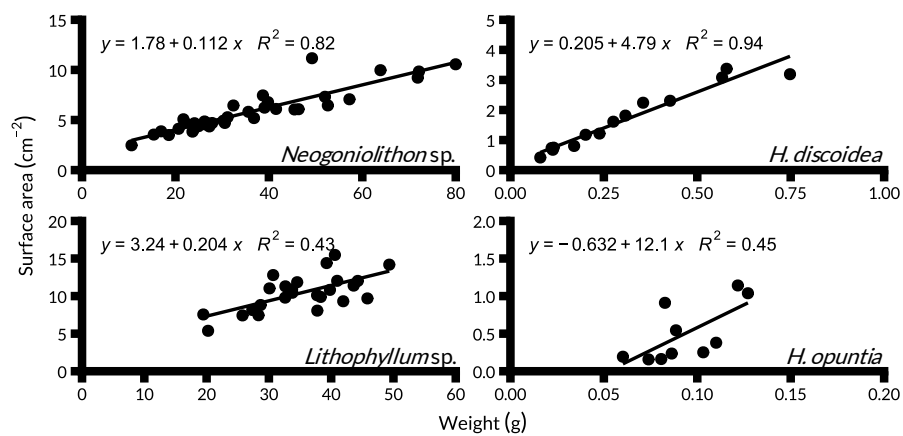

**Figure S10.** Surface-area-weight relationship in the four study species.

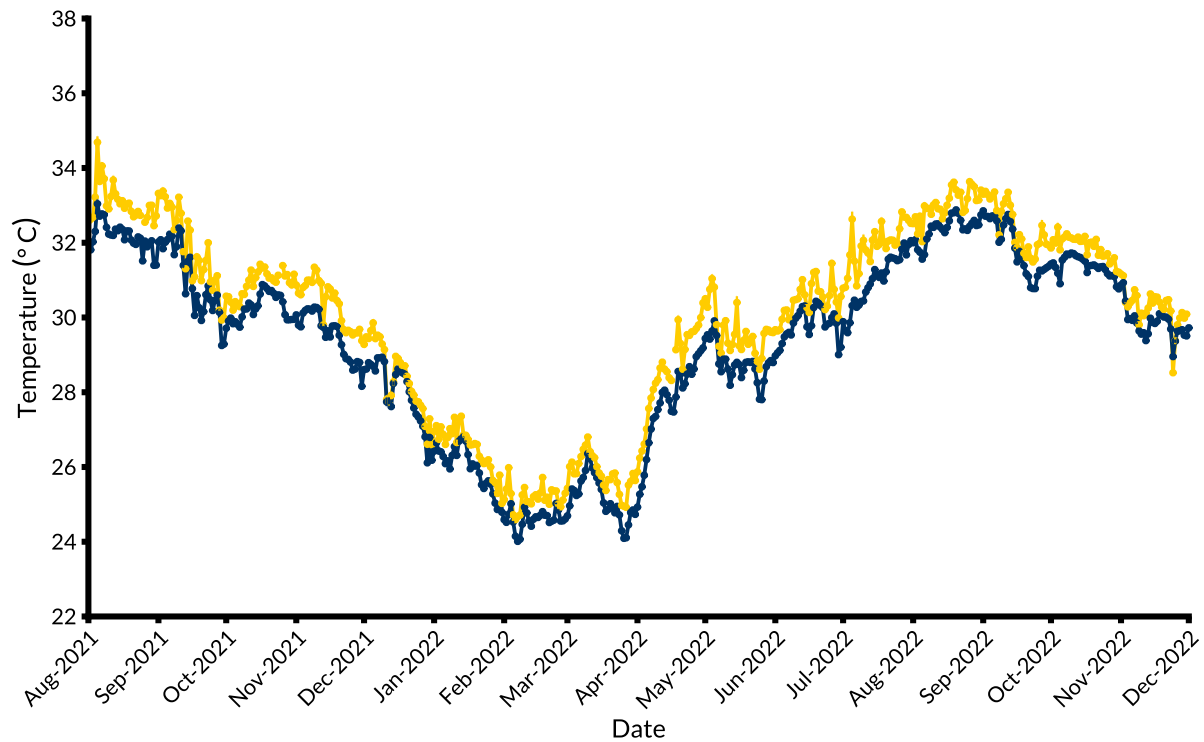

**Figure S11.** Average day (7am to 7pm; yellow) and night (8 pm to 6 am; blue) temperature at Al-Fahal recorded with loggers. Logging interval was set to 10 min. Dots indicate averages and error bars the standard error.

**Table S10.** Calcification (mg  $\text{CaCO}_3 \text{ cm}^{-2} \text{ d}^{-1}$ ) over the pre-impact phase.

| Species                   | Maximum temperature | Variability | Mean $\pm$ SE        | n  | Model statistics (MHW) | Model statistics (Var.)     | Model statistics (Var.*MHW) |
|---------------------------|---------------------|-------------|----------------------|----|------------------------|-----------------------------|-----------------------------|
| <i>Lithophyllum</i> sp.   | 34                  | YES         | 0.0002 $\pm$ 0.0003  | 27 | df = 10.56             | df = 10.56                  | df = 10.56                  |
|                           |                     | NO          | 0.0001 $\pm$ 0.0004  | 15 | F = 0.31               | F = 0.35                    | F = 0.33                    |
|                           | 31                  | YES         | -0.0001 $\pm$ 0.0002 | 24 | p = 0.59               | p = 0.57                    | p = 0.58                    |
|                           |                     | NO          | 0.0001 $\pm$ 0.0002  | 15 |                        | cond. R <sup>2</sup> = 0.06 |                             |
| <i>Neogoniolithon</i> sp. | 34                  | YES         | 0.0881 $\pm$ 0.0151  | 29 | df = 11.93             | df = 11.92                  | df = 11.93                  |
|                           |                     | NO          | 0.1573 $\pm$ 0.0288  | 13 | F = 7.61               | F = 0.45                    | F = 0.62                    |
|                           | 31                  | YES         | 0.0475 $\pm$ 0.0127  | 20 | <b>p = 0.02</b>        | p = 0.51                    | p = 0.45                    |
|                           |                     | NO          | 0.0827 $\pm$ 0.0136  | 15 |                        | cond. R <sup>2</sup> = 0.26 |                             |
| <i>H. opuntia</i>         | 34                  | YES         | -0.2199 $\pm$ 0.0071 | 8  | df = 6.41              | df = 6.43                   | df = 6.41                   |
|                           |                     | NO          | -0.1358 $\pm$ 0.0373 | 7  | F = 0.59               | F = 0.09                    | F = 0.04                    |
|                           | 31                  | YES         | -0.2100 $\pm$ 0.0196 | 10 | p = 0.47               | p = 0.78                    | p = 0.84                    |
|                           |                     | NO          | -0.1029 $\pm$ 0.0498 | 6  |                        | cond. R <sup>2</sup> = 0.55 |                             |
| <i>H. discoidea</i>       | 34                  | YES         | 0.0941 $\pm$ 0.0296  | 18 | df = 9.81              | df = 9.98                   | df = 9.81                   |
|                           |                     | NO          | -0.0159 $\pm$ 0.0509 | 8  | F = 4.37               | F = 0.74                    | F = 0.93                    |
|                           | 31                  | YES         | 0.1341 $\pm$ 0.0242  | 14 | p = 0.06               | p = 0.41                    | p = 0.36                    |
|                           |                     | NO          | 0.0897 $\pm$ 0.0225  | 8  |                        | cond. R <sup>2</sup> = 0.19 |                             |

**Table S11.** Calcification (mg  $\text{CaCO}_3 \text{ cm}^{-2} \text{ d}^{-1}$ ) over the impact phase.

| Species                   | Maximum temperature | Variability | Mean $\pm$ SE      | n  | Model statistics (MHW) | Model statistics (Var.)     | Model statistics (Var.*MHW) |
|---------------------------|---------------------|-------------|--------------------|----|------------------------|-----------------------------|-----------------------------|
| <i>Lithophyllum</i> sp.   | 34                  | YES         | 0.005 $\pm$ 0.010  | 29 | df = 12.31             | df = 12.32                  | df = 12.31                  |
|                           |                     | NO          | -0.001 $\pm$ 0.013 | 14 | F = 5.87               | F = 1.76                    | F = 1.61                    |
|                           | 31                  | YES         | 0.063 $\pm$ 0.006  | 22 | <b>p = 0.03</b>        | p = 0.21                    | p = 0.23                    |
|                           |                     | NO          | 0.022 $\pm$ 0.011  | 14 |                        | cond. R <sup>2</sup> = 0.47 |                             |
| <i>Neogoniolithon</i> sp. | 34                  | YES         | -0.161 $\pm$ 0.014 | 25 | df = 67.00             | df = 67.00                  | df = 67.00                  |
|                           |                     | NO          | -0.147 $\pm$ 0.008 | 11 | F = 1.65               | F = 8.15                    | F = 7.65                    |
|                           | 31                  | YES         | -0.095 $\pm$ 0.017 | 22 | p = 0.20               | <b>p = 0.01</b>             | <b>p = 0.01</b>             |
|                           |                     | NO          | -0.171 $\pm$ 0.014 | 13 |                        | cond. R <sup>2</sup> = 0.19 |                             |
| <i>H. opuntia</i>         | 34                  | YES         | -0.007 $\pm$ 0.003 | 8  | df = 25.00             | df = 25.00                  | df = 25.00                  |
|                           |                     | NO          | -0.025 $\pm$ 0.015 | 6  | F = 6.60               | F = 9.61                    | F = 9.33                    |
|                           | 31                  | YES         | -0.011 $\pm$ 0.006 | 10 | <b>p = 0.02</b>        | <b>p &lt; 0.01</b>          | <b>p = 0.01</b>             |
|                           |                     | NO          | 0.027 $\pm$ 0.015  | 5  |                        | cond. R <sup>2</sup> = 0.33 |                             |
| <i>H. discoidea</i>       | 34                  | YES         | 0.012 $\pm$ 0.036  | 18 | df = 44.00             | df = 44.00                  | df = 44.00                  |
|                           |                     | NO          | 0.031 $\pm$ 0.057  | 8  | F = 0.02               | F = 0.92                    | F = 0.88                    |
|                           | 31                  | YES         | 0.043 $\pm$ 0.020  | 14 | p = 0.89               | p = 0.34                    | p = 0.35                    |
|                           |                     | NO          | -0.011 $\pm$ 0.032 | 8  |                        | cond. R <sup>2</sup> = 0.02 |                             |

**Table S12.** Calcification (mg  $\text{CaCO}_3 \text{ cm}^{-2} \text{ d}^{-1}$ ) over the recovery phase.

| Species                   | Maximum temperature | Variability | Mean $\pm$ SE        | n  | Model statistics (MHW) | Model statistics (Var.) | Model statistics (Var.*MHW) |
|---------------------------|---------------------|-------------|----------------------|----|------------------------|-------------------------|-----------------------------|
| <i>Lithophyllum</i> sp.   | 34                  | YES         | $0.0006 \pm 0.0003$  | 28 | df = 11.55             | df = 11.54              | df = 11.55                  |
|                           |                     | NO          | $-0.0001 \pm 0.0002$ | 15 | F = 1.42               | F = 0.08                | F = 0.12                    |
|                           | 31                  | YES         | $0.0009 \pm 0.0002$  | 25 | p = 0.26               | p = 0.78                | p = 0.73                    |
|                           |                     | NO          | $0.0005 \pm 0.0002$  | 15 |                        | cond. $R^2 = 0.33$      |                             |
| <i>Neogoniolithon</i> sp. | 34                  | YES         | $-0.0739 \pm 0.0146$ | 23 | df = 63.00             | df = 63.00              | df = 63.00                  |
|                           |                     | NO          | $-0.1195 \pm 0.0191$ | 10 | F = 7.29               | F = 5.96                | F = 0.04                    |
|                           | 31                  | YES         | $-0.0154 \pm 0.0227$ | 21 | <b>p = 0.01</b>        | <b>p = 0.02</b>         | p = 0.85                    |
|                           |                     | NO          | $-0.0687 \pm 0.0134$ | 13 |                        | cond. $R^2 = 0.17$      |                             |
| <i>H. opuntia</i>         | 34                  | YES         | $-0.0050 \pm 0.0036$ | 8  | df = 4.04              | df = 4.15               | df = 4.04                   |
|                           |                     | NO          | $0.0153 \pm 0.0179$  | 7  | F = 3.00               | F = 2.70                | F = 2.36                    |
|                           | 31                  | YES         | $0.0001 \pm 0.0092$  | 10 | p = 0.16               | p = 0.17                | p = 0.20                    |
|                           |                     | NO          | $0.0898 \pm 0.0492$  | 5  |                        | cond. $R^2 = 0.36$      |                             |
| <i>H. discoidea</i>       | 34                  | YES         | $-0.0728 \pm 0.0855$ | 12 | df = 29.00             | df = 29.00              | df = 29.00                  |
|                           |                     | NO          | $-0.0148 \pm 0.0379$ | 4  | F = 0.86               | F = 0.01                | F = 0.02                    |
|                           | 31                  | YES         | $-0.1503 \pm 0.0647$ | 12 | p = 0.36               | p = 0.92                | p = 0.90                    |
|                           |                     | NO          | $-0.1161 \pm 0.1036$ | 5  |                        | cond. $R^2 = 0.03$      |                             |

**Table S13.** Calcification (mg  $\text{CaCO}_3 \text{ cm}^{-2} \text{ d}^{-1}$ ) over the pre-impact phase in the treatments with peaks in temperature occurring during the day or at night.

| Species                   | Maximum temperature | Variability | Mean $\pm$ SE        | n  | Model statistics (MHW) | Model statistics (Var.) | Model statistics (Var.*MHW) |
|---------------------------|---------------------|-------------|----------------------|----|------------------------|-------------------------|-----------------------------|
| <i>Lithophyllum</i> sp.   | 34                  | DAY         | $0.0004 \pm 0.0004$  | 14 | df = 6.47              | df = 6.44               | df = 6.47                   |
|                           |                     | NIGHT       | $-0.0001 \pm 0.0004$ | 13 | F = 0.50               | F = 0.36                | F = 0.40                    |
|                           | 31                  | DAY         | $-0.0001 \pm 0.0003$ | 10 | p = 0.50               | p = 0.57                | p = 0.55                    |
|                           |                     | NIGHT       | $-0.0001 \pm 0.0002$ | 14 |                        | cond. $R^2 = 0.21$      |                             |
| <i>Neogoniolithon</i> sp. | 34                  | DAY         | $0.1002 \pm 0.0276$  | 14 | df = 7.07              | df = 7.13               | df = 7.07                   |
|                           |                     | NIGHT       | $0.0768 \pm 0.0144$  | 15 | F = 0.87               | F = 0.03                | F = 0.04                    |
|                           | 31                  | DAY         | $0.0705 \pm 0.0239$  | 7  | p = 0.38               | p = 0.87                | p = 0.84                    |
|                           |                     | NIGHT       | $0.0352 \pm 0.0143$  | 13 |                        | cond. $R^2 = 0.21$      |                             |
| <i>H. opuntia</i>         | 34                  | DAY         | $-0.4310 \pm 0.0128$ | 7  | df = 6.12              | df = 6.10               | df = 6.12                   |
|                           |                     | NIGHT       | $-0.5009 \pm -$      | 1  | F = 10.52              | F = 8.42                | F = 7.05                    |
|                           | 31                  | DAY         | $-0.2107 \pm 0.0608$ | 2  | <b>p = 0.02</b>        | <b>p = 0.03</b>         | <b>p = 0.04</b>             |
|                           |                     | NIGHT       | $-0.4722 \pm 0.0198$ | 8  |                        | cond. $R^2 = 0.78$      |                             |
| <i>H. discoidea</i>       | 34                  | DAY         | $0.1732 \pm 0.1063$  | 9  | df = 4.56              | df = 4.58               | df = 4.56                   |
|                           |                     | NIGHT       | $0.2033 \pm 0.0593$  | 9  | F = 0.58               | F = 0.03                | F = 0.03                    |
|                           | 31                  | DAY         | $0.2839 \pm 0.0644$  | 7  | p = 0.48               | p = 0.88                | p = 0.88                    |
|                           |                     | NIGHT       | $0.2523 \pm 0.0769$  | 7  |                        | cond. $R^2 = 0.21$      |                             |

**Table S14.** Calcification (mg  $\text{CaCO}_3 \text{ cm}^{-2} \text{ d}^{-1}$ ) over the impact phase in the treatments with peaks in temperature occurring during the day or at night.

| Species                   | Maximum temperature | Variability | Mean $\pm$ SE        | n  | Model statistics (MHW) | Model statistics (Var.)     | Model statistics (Var.*MHW) |
|---------------------------|---------------------|-------------|----------------------|----|------------------------|-----------------------------|-----------------------------|
| <i>Lithophyllum</i> sp.   | 34                  | DAY         | 0.0241 $\pm$ 0.0427  | 15 | df = 6.63              | df = 6.61                   | df = 6.63                   |
|                           |                     | NIGHT       | -0.0149 $\pm$ 0.0542 | 14 | F = 10.22              | F = 1.49                    | F = 1.65                    |
|                           | 31                  | DAY         | 0.0678 $\pm$ 0.0352  | 9  | <b>p = 0.02</b>        | p = 0.26                    | p = 0.24                    |
|                           |                     | NIGHT       | 0.0595 $\pm$ 0.0180  | 13 |                        | cond. R <sup>2</sup> = 0.30 |                             |
| <i>Neogoniolithon</i> sp. | 34                  | DAY         | -0.1527 $\pm$ 0.0501 | 10 | df = 42.00             | df = 42.00                  | df = 42.00                  |
|                           |                     | NIGHT       | -0.1664 $\pm$ 0.0806 | 15 | F = 6.64               | F = 0.61                    | F = 0.56                    |
|                           | 31                  | DAY         | -0.1149 $\pm$ 0.0728 | 8  | <b>p = 0.01</b>        | p = 0.44                    | p = 0.46                    |
|                           |                     | NIGHT       | -0.0830 $\pm$ 0.0829 | 14 |                        | cond. R <sup>2</sup> = 0.17 |                             |
| <i>H. opuntia</i>         | 34                  | DAY         | -0.0080 $\pm$ 0.0082 | 7  | df = 3.31              | df = 3.31                   | df = 3.31                   |
|                           |                     | NIGHT       | 0.0016 $\pm$ -       | 1  | F = 5.32               | F = 2.26                    | F = 1.87                    |
|                           | 31                  | DAY         | -0.0384 $\pm$ 0.0234 | 2  | p = 0.10               | p = 0.22                    | p = 0.26                    |
|                           |                     | NIGHT       | -0.0046 $\pm$ 0.0078 | 8  |                        | cond. R <sup>2</sup> = 0.71 |                             |
| <i>H. discoidea</i>       | 34                  | DAY         | 0.0333 $\pm$ 0.1762  | 9  | df = 28.00             | df = 28.00                  | df = 28.00                  |
|                           |                     | NIGHT       | -0.0100 $\pm$ 0.1319 | 9  | F = 0.49               | F = 0.37                    | F = 0.30                    |
|                           | 31                  | DAY         | 0.0884 $\pm$ 0.0497  | 7  | p = 0.49               | p = 0.55                    | p = 0.59                    |
|                           |                     | NIGHT       | -0.0032 $\pm$ 0.0722 | 7  |                        | cond. R <sup>2</sup> = 0.09 |                             |

**Table S15.** Calcification (mg  $\text{CaCO}_3 \text{ cm}^{-2} \text{ d}^{-1}$ ) over the recovery phase in the treatments with peaks in temperature occurring during the day or at night.

| Species                   | Maximum temperature | Variability | Mean $\pm$ SE        | n  | Model statistics (MHW) | Model statistics (Var.)     | Model statistics (Var.*MHW) |
|---------------------------|---------------------|-------------|----------------------|----|------------------------|-----------------------------|-----------------------------|
| <i>Lithophyllum</i> sp.   | 34                  | DAY         | 0.0009 $\pm$ 0.0003  | 15 | df = 5.84              | df = 5.83                   | df = 5.84                   |
|                           |                     | NIGHT       | 0.0001 $\pm$ 0.0004  | 13 | F = 0.32               | F = 0.43                    | F = 0.47                    |
|                           | 31                  | DAY         | 0.0009 $\pm$ 0.0002  | 10 | p = 0.59               | p = 0.54                    | p = 0.52                    |
|                           |                     | NIGHT       | 0.0009 $\pm$ 0.0003  | 15 |                        | cond. R <sup>2</sup> = 0.36 |                             |
| <i>Neogoniolithon</i> sp. | 34                  | DAY         | -0.0791 $\pm$ 0.0250 | 10 | df = 40.00             | df = 40.00                  | df = 40.00                  |
|                           |                     | NIGHT       | -0.0699 $\pm$ 0.0180 | 13 | F = 4.27               | F = 0.07                    | F < 0.01                    |
|                           | 31                  | DAY         | -0.0190 $\pm$ 0.0446 | 7  | <b>p = 0.05</b>        | p = 0.80                    | p = 0.95                    |
|                           |                     | NIGHT       | -0.0136 $\pm$ 0.0271 | 14 |                        | cond. R <sup>2</sup> = 0.10 |                             |
| <i>H. opuntia</i>         | 34                  | DAY         | -0.0058 $\pm$ 0.0041 | 7  | df = 14.00             | df = 14.00                  | df = 14.00                  |
|                           |                     | NIGHT       | -0.0039 $\pm$ -      | 1  | F = 0.01               | F = 0.40                    | F = 0.35                    |
|                           | 31                  | DAY         | -0.0161 $\pm$ 0.0425 | 2  | p = 0.94               | p = 0.54                    | p = 0.56                    |
|                           |                     | NIGHT       | 0.0042 $\pm$ 0.0077  | 8  |                        | cond. R <sup>2</sup> = 0.08 |                             |
| <i>H. discoidea</i>       | 34                  | DAY         | -0.0698 $\pm$ 0.1163 | 7  | df = 28.00             | df = 28.00                  | df = 28.00                  |
|                           |                     | NIGHT       | -0.0770 $\pm$ 0.1409 | 5  | F = 0.49               | F = 0.37                    | F = 0.30                    |
|                           | 31                  | DAY         | -0.1722 $\pm$ 0.1165 | 6  | p = 0.49               | p = 0.55                    | p = 0.59                    |
|                           |                     | NIGHT       | -0.1283 $\pm$ 0.0681 | 6  |                        | cond. R <sup>2</sup> = 0.09 |                             |

**Table S16.** Photosynthetic efficiency (Fv/Fm) during the pre-impact phase.

| Species                   | Maximum temperature | Variability | Mean $\pm$ SE   | n  | Model statistics (MHW) | Model statistics (Var.)     | Model statistics (Var.*MHW) |
|---------------------------|---------------------|-------------|-----------------|----|------------------------|-----------------------------|-----------------------------|
| <i>Lithophyllum</i> sp.   | 34                  | YES         | 0.49 $\pm$ 0.02 | 29 | df = 14.28             | df = 14.29                  | df = 14.28                  |
|                           |                     | NO          | 0.48 $\pm$ 0.02 | 16 | F = 0.23               | F = 0.03                    | F = 0.02                    |
|                           | 31                  | YES         | 0.52 $\pm$ 0.02 | 28 | p = 0.64               | p = 0.87                    | p = 0.89                    |
|                           |                     | NO          | 0.49 $\pm$ 0.02 | 15 |                        | cond. R <sup>2</sup> = 0.43 |                             |
| <i>Neogoniolithon</i> sp. | 34                  | YES         | 0.44 $\pm$ 0.02 | 29 | df = 14.02             | df = 13.99                  | df = 14.02                  |
|                           |                     | NO          | 0.53 $\pm$ 0.03 | 12 | F = 0.74               | F = 0.76                    | F = 0.93                    |
|                           | 31                  | YES         | 0.50 $\pm$ 0.02 | 20 | p = 0.40               | p = 0.40                    | p = 0.35                    |
|                           |                     | NO          | 0.52 $\pm$ 0.02 | 14 |                        | cond. R <sup>2</sup> = 0.18 |                             |
| <i>H. opuntia</i>         | 34                  | YES         | 0.60 $\pm$ 0.01 | 28 | df = 14.10             | df = 14.00                  | df = 14.10                  |
|                           |                     | NO          | 0.60 $\pm$ 0.02 | 13 | F = 1.28               | F = 0.03                    | F = 0.02                    |
|                           | 31                  | YES         | 0.60 $\pm$ 0.02 | 28 | p = 0.28               | p = 0.87                    | p = 0.90                    |
|                           |                     | NO          | 0.65 $\pm$ 0.02 | 12 |                        | cond. R <sup>2</sup> = 0.25 |                             |
| <i>H. discoidea</i>       | 34                  | YES         | 0.76 $\pm$ 0.01 | 28 | df = 14.69             | df = 14.70                  | df = 14.69                  |
|                           |                     | NO          | 0.75 $\pm$ 0.01 | 11 | F = 0.50               | F = 0.75                    | F = 0.70                    |
|                           | 31                  | YES         | 0.74 $\pm$ 0.01 | 26 | p = 0.49               | p = 0.40                    | p = 0.42                    |
|                           |                     | NO          | 0.73 $\pm$ 0.01 | 13 |                        | cond. R <sup>2</sup> = 0.30 |                             |

**Table S17.** Photosynthetic efficiency (Fv/Fm) during the impact phase.

| Species                   | Maximum temperature | Variability | Mean $\pm$ SE   | n  | Model statistics (MHW) | Model statistics (Var.)     | Model statistics (Var.*MHW) |
|---------------------------|---------------------|-------------|-----------------|----|------------------------|-----------------------------|-----------------------------|
| <i>Lithophyllum</i> sp.   | 34                  | YES         | 0.58 $\pm$ 0.01 | 28 | df = 13.94             | df = 14.00                  | df = 13.94                  |
|                           |                     | NO          | 0.58 $\pm$ 0.01 | 14 | F = 8.04               | F = 6.53                    | F = 6.04                    |
|                           | 31                  | YES         | 0.58 $\pm$ 0.01 | 24 | <b>p = 0.01</b>        | <b>p = 0.02</b>             | <b>p = 0.03</b>             |
|                           |                     | NO          | 0.64 $\pm$ 0.01 | 13 |                        | cond. R <sup>2</sup> = 0.22 |                             |
| <i>Neogoniolithon</i> sp. | 34                  | YES         | 0.50 $\pm$ 0.03 | 24 | df = 57.00             | df = 57.00                  | df = 57.00                  |
|                           |                     | NO          | 0.49 $\pm$ 0.02 | 10 | F = 12.31              | F = 0.55                    | F = 0.52                    |
|                           | 31                  | YES         | 0.57 $\pm$ 0.02 | 16 | <b>p &lt; 0.01</b>     | p = 0.46                    | p = 0.47                    |
|                           |                     | NO          | 0.61 $\pm$ 0.01 | 11 |                        | cond. R <sup>2</sup> = 0.18 |                             |
| <i>H. opuntia</i>         | 34                  | YES         | 0.61 $\pm$ 0.02 | 12 | df = 6.40              | df = 6.36                   | df = 6.40                   |
|                           |                     | NO          | 0.67 $\pm$ 0.03 | 6  | F = 2.87               | F = 0.43                    | F = 0.50                    |
|                           | 31                  | YES         | 0.67 $\pm$ 0.02 | 10 | p = 0.14               | p = 0.54                    | p = 0.50                    |
|                           |                     | NO          | 0.69 $\pm$ 0.01 | 9  |                        | cond. R <sup>2</sup> = 0.60 |                             |
| <i>H. discoidea</i>       | 34                  | YES         | 0.71 $\pm$ 0.01 | 23 | df = 9.08              | df = 9.18                   | df = 9.08                   |
|                           |                     | NO          | 0.72 $\pm$ 0.02 | 8  | F = 0.02               | F = 0.01                    | F = 0.01                    |
|                           | 31                  | YES         | 0.71 $\pm$ 0.01 | 15 | p = 0.88               | p = 0.94                    | p = 0.93                    |
|                           |                     | NO          | 0.72 $\pm$ 0.01 | 9  |                        | cond. R <sup>2</sup> = 0.04 |                             |

**Table S18.** Photosynthetic efficiency (Fv/Fm) during the recovery phase.

| Species                   | Maximum temperature | Variability | Mean $\pm$ SE   | n  | Model statistics (MHW) | Model statistics (Var.)     | Model statistics (Var.*MHW) |
|---------------------------|---------------------|-------------|-----------------|----|------------------------|-----------------------------|-----------------------------|
| <i>Lithophyllum</i> sp.   | 34                  | YES         | 0.64 $\pm$ 0.01 | 29 | df = 13.78             | df = 13.81                  | df = 13.78                  |
|                           |                     | NO          | 0.60 $\pm$ 0.02 | 14 | F = 5.60               | F = 0.30                    | F = 0.38                    |
|                           | 31                  | YES         | 0.67 $\pm$ 0.02 | 25 | <b>p = 0.03</b>        | p = 0.59                    | p = 0.55                    |
|                           |                     | NO          | 0.66 $\pm$ 0.01 | 13 |                        | cond. R <sup>2</sup> = 0.23 |                             |
| <i>Neogoniolithon</i> sp. | 34                  | YES         | 0.62 $\pm$ 0.02 | 28 | df = 13.28             | df = 13.23                  | df = 13.28                  |
|                           |                     | NO          | 0.55 $\pm$ 0.03 | 11 | F = 2.27               | F = 0.36                    | F = 0.44                    |
|                           | 31                  | YES         | 0.65 $\pm$ 0.02 | 21 | p = 0.16               | p = 0.56                    | p = 0.52                    |
|                           |                     | NO          | 0.63 $\pm$ 0.04 | 14 |                        | cond. R <sup>2</sup> = 0.40 |                             |
| <i>H. opuntia</i>         | 34                  | YES         | 0.66 $\pm$ 0.05 | 9  | df = 4.69              | df = 4.73                   | df = 4.69                   |
|                           |                     | NO          | 0.66 $\pm$ 0.03 | 4  | F = 0.18               | F = 0.39                    | F = 0.35                    |
|                           | 31                  | YES         | 0.67 $\pm$ 0.03 | 8  | p = 0.69               | p = 0.56                    | p = 0.58                    |
|                           |                     | NO          | 0.71 $\pm$ 0.02 | 9  |                        | cond. R <sup>2</sup> = 0.37 |                             |
| <i>H. discoidea</i>       | 34                  | YES         | 0.73 $\pm$ 0.02 | 16 | df = 14.06             | df = 14.09                  | df = 14.06                  |
|                           |                     | NO          | 0.66 $\pm$ 0.03 | 6  | F = 0.06               | F = 1.29                    | F = 1.44                    |
|                           | 31                  | YES         | 0.69 $\pm$ 0.02 | 13 | p = 0.82               | p = 0.28                    | p = 0.25                    |
|                           |                     | NO          | 0.68 $\pm$ 0.03 | 7  |                        | cond. R <sup>2</sup> = 0.13 |                             |

**Table S19.** Photosynthetic efficiency (Fv/Fm) during the pre-impact phase in the treatments with peaks in temperature occurring during the day or at night.

| Species                   | Maximum temperature | Variability | Mean $\pm$ SE   | n  | Model statistics (MHW) | Model statistics (Var.)     | Model statistics (Var.*MHW) |
|---------------------------|---------------------|-------------|-----------------|----|------------------------|-----------------------------|-----------------------------|
| <i>Lithophyllum</i> sp.   | 34                  | DAY         | 0.55 $\pm$ 0.02 | 14 | df = 8.38              | df = 8.39                   | df = 8.38                   |
|                           |                     | NIGHT       | 0.44 $\pm$ 0.03 | 15 | F = 0.21               | F = 0.50                    | F = 0.63                    |
|                           | 31                  | DAY         | 0.53 $\pm$ 0.02 | 13 | p = 0.66               | p = 0.50                    | p = 0.45                    |
|                           |                     | NIGHT       | 0.50 $\pm$ 0.02 | 15 |                        | cond. R <sup>2</sup> = 0.47 |                             |
| <i>Neogoniolithon</i> sp. | 34                  | DAY         | 0.47 $\pm$ 0.03 | 14 | df = 45.00             | df = 45.00                  | df = 45.00                  |
|                           |                     | NIGHT       | 0.41 $\pm$ 0.03 | 15 | F = 2.26               | F = 2.52                    | F = 2.58                    |
|                           | 31                  | DAY         | 0.46 $\pm$ 0.04 | 8  | p = 0.14               | p = 0.12                    | p = 0.12                    |
|                           |                     | NIGHT       | 0.52 $\pm$ 0.01 | 12 |                        | cond. R <sup>2</sup> = 0.11 |                             |
| <i>H. opuntia</i>         | 34                  | DAY         | 0.61 $\pm$ 0.02 | 14 | df = 8.28              | df = 8.29                   | df = 8.28                   |
|                           |                     | NIGHT       | 0.59 $\pm$ 0.02 | 14 | F = 0.01               | F = 0.01                    | F = 0.02                    |
|                           | 31                  | DAY         | 0.60 $\pm$ 0.03 | 14 | p = 0.92               | p = 0.91                    | p = 0.90                    |
|                           |                     | NIGHT       | 0.59 $\pm$ 0.04 | 14 |                        | cond. R <sup>2</sup> = 0.37 |                             |
| <i>H. discoidea</i>       | 34                  | DAY         | 0.77 $\pm$ 0.01 | 13 | df = 7.08              | df = 7.05                   | df = 7.08                   |
|                           |                     | NIGHT       | 0.74 $\pm$ 0.01 | 15 | F = 0.46               | F = 0.00                    | F = 0.01                    |
|                           | 31                  | DAY         | 0.75 $\pm$ 0.01 | 11 | p = 0.52               | p = 0.97                    | p = 0.92                    |
|                           |                     | NIGHT       | 0.73 $\pm$ 0.01 | 15 |                        | cond. R <sup>2</sup> = 0.35 |                             |

**Table S20.** Photosynthetic efficiency (Fv/Fm) during the impact phase in the treatments with peaks in temperature occurring during the day or at night.

| Species                   | Maximum temperature | Variability | Mean $\pm$ SE   | n  | Model statistics (MHW) | Model statistics (Var.)     | Model statistics (Var.*MHW) |
|---------------------------|---------------------|-------------|-----------------|----|------------------------|-----------------------------|-----------------------------|
| <i>Lithophyllum</i> sp.   | 34                  | DAY         | 0.59 $\pm$ 0.02 | 14 | df = 48.00             | df = 48.00                  | df = 48.00                  |
|                           |                     | NIGHT       | 0.57 $\pm$ 0.01 | 14 | F = 0.26               | F = 0.22                    | F = 0.17                    |
|                           | 31                  | DAY         | 0.60 $\pm$ 0.01 | 9  | p = 0.61               | p = 0.64                    | p = 0.68                    |
|                           |                     | NIGHT       | 0.57 $\pm$ 0.01 | 15 |                        | cond. R <sup>2</sup> = 0.04 |                             |
| <i>Neogoniolithon</i> sp. | 34                  | DAY         | 0.53 $\pm$ 0.03 | 12 | df = 36.00             | df = 36.00                  | df = 36.00                  |
|                           |                     | NIGHT       | 0.47 $\pm$ 0.04 | 12 | F = 4.55               | F = 0.02                    | F = 0.04                    |
|                           | 31                  | DAY         | 0.60 $\pm$ 0.04 | 7  | <b>p = 0.04</b>        | p = 0.90                    | p = 0.84                    |
|                           |                     | NIGHT       | 0.55 $\pm$ 0.01 | 9  |                        | cond. R <sup>2</sup> = 0.15 |                             |
| <i>H. opuntia</i>         | 34                  | DAY         | 0.64 $\pm$ 0.02 | 8  | df = 5.46              | df = 5.58                   | df = 5.46                   |
|                           |                     | NIGHT       | 0.56 $\pm$ 0.03 | 4  | F = 4.47               | F = 0.37                    | F = 0.46                    |
|                           | 31                  | DAY         | 0.69 $\pm$ 0.04 | 2  | p = 0.08               | p = 0.57                    | p = 0.53                    |
|                           |                     | NIGHT       | 0.66 $\pm$ 0.02 | 8  |                        | cond. R <sup>2</sup> = 0.60 |                             |
| <i>H. discoidea</i>       | 34                  | DAY         | 0.73 $\pm$ 0.01 | 11 | df = 34.00             | df = 34.00                  | df = 34.00                  |
|                           |                     | NIGHT       | 0.69 $\pm$ 0.02 | 12 | F = 0.03               | F = 0.03                    | F = 0.07                    |
|                           | 31                  | DAY         | 0.73 $\pm$ 0.02 | 7  | p = 0.87               | p = 0.85                    | p = 0.79                    |
|                           |                     | NIGHT       | 0.70 $\pm$ 0.02 | 8  |                        | cond. R <sup>2</sup> = 0.08 |                             |

**Table S21.** Photosynthetic efficiency (Fv/Fm) during the recovery phase in the treatments with peaks in temperature occurring during the day or at night.

| Species                   | Maximum temperature | Variability | Mean $\pm$ SE   | n  | Model statistics (MHW) | Model statistics (Var.)     | Model statistics (Var.*MHW) |
|---------------------------|---------------------|-------------|-----------------|----|------------------------|-----------------------------|-----------------------------|
| <i>Lithophyllum</i> sp.   | 34                  | DAY         | 0.63 $\pm$ 0.01 | 14 | df = 7.09              | df = 7.08                   | df = 7.09                   |
|                           |                     | NIGHT       | 0.65 $\pm$ 0.02 | 15 | F = 2.03               | F = 1.26                    | F = 1.21                    |
|                           | 31                  | DAY         | 0.70 $\pm$ 0.02 | 10 | p = 0.20               | p = 0.30                    | p = 0.31                    |
|                           |                     | NIGHT       | 0.66 $\pm$ 0.02 | 15 |                        | cond. R <sup>2</sup> = 0.26 |                             |
| <i>Neogoniolithon</i> sp. | 34                  | DAY         | 0.62 $\pm$ 0.01 | 14 | df = 7.06              | df = 7.10                   | df = 7.06                   |
|                           |                     | NIGHT       | 0.63 $\pm$ 0.03 | 14 | F = 0.89               | F = 0.02                    | F = 0.03                    |
|                           | 31                  | DAY         | 0.65 $\pm$ 0.03 | 8  | p = 0.38               | p = 0.88                    | p = 0.87                    |
|                           |                     | NIGHT       | 0.65 $\pm$ 0.02 | 13 |                        | cond. R <sup>2</sup> = 0.18 |                             |
| <i>H. opuntia</i>         | 34                  | DAY         | 0.73 $\pm$ 0.03 | 6  | df = 13.00             | df = 13.00                  | df = 13.00                  |
|                           |                     | NIGHT       | 0.53 $\pm$ 0.11 | 3  | F = 0.34               | F = 3.32                    | F = 3.64                    |
|                           | 31                  | DAY         | 0.65 $\pm$ 0.09 | 2  | p = 0.57               | p = 0.09                    | p = 0.08                    |
|                           |                     | NIGHT       | 0.67 $\pm$ 0.03 | 6  |                        | cond. R <sup>2</sup> = 0.31 |                             |
| <i>H. discoidea</i>       | 34                  | DAY         | 0.76 $\pm$ 0.03 | 9  | df = 25.00             | df = 25.00                  | df = 25.00                  |
|                           |                     | NIGHT       | 0.68 $\pm$ 0.02 | 7  | F = 1.39               | F = 2.28                    | F = 2.53                    |
|                           | 31                  | DAY         | 0.69 $\pm$ 0.03 | 7  | p = 0.25               | p = 0.14                    | p = 0.12                    |
|                           |                     | NIGHT       | 0.69 $\pm$ 0.02 | 6  |                        | cond. R <sup>2</sup> = 0.21 |                             |

**Table S22.** Maximum relative electron transport rate (rETRmax) during the pre-impact phase.

| Species                   | Maximum temperature | Variability | Mean $\pm$ SE    | n  | Model statistics (MHW) | Model statistics (Var.)     | Model statistics (Var.*MHW) |
|---------------------------|---------------------|-------------|------------------|----|------------------------|-----------------------------|-----------------------------|
| <i>Lithophyllum</i> sp.   | 34                  | YES         | 22.26 $\pm$ 4.41 | 9  | df = 9.36              | df = 9.28                   | df = 9.36                   |
|                           |                     | NO          | 15.09 $\pm$ 3.45 | 5  | F = 1.53               | F = 3.39                    | F = 3.33                    |
|                           | 31                  | YES         | 16.92 $\pm$ 3.49 | 10 | p = 0.25               | p = 0.10                    | p = 0.10                    |
|                           |                     | NO          | 31.56 $\pm$ 1.22 | 4  |                        | cond. R <sup>2</sup> = 0.60 |                             |
| <i>Neogoniolithon</i> sp. | 34                  | YES         | 28.31 $\pm$ 4.67 | 10 | df = 13.21             | df = 13.19                  | df = 13.21                  |
|                           |                     | NO          | 23.44 $\pm$ 6.08 | 5  | F = 0.02               | F = 2.59                    | F = 2.43                    |
|                           | 31                  | YES         | 16.47 $\pm$ 2.94 | 10 | p = 0.89               | p = 0.13                    | p = 0.14                    |
|                           |                     | NO          | 36.31 $\pm$ 7.61 | 5  |                        | cond. R <sup>2</sup> = 0.73 |                             |
| <i>H. opuntia</i>         | 34                  | YES         | 10.66 $\pm$ 0.95 | 9  | df = 13.18             | df = 13.16                  | df = 13.18                  |
|                           |                     | NO          | 10.86 $\pm$ 2.23 | 5  | F = 0.04               | F = 1.48                    | F = 1.35                    |
|                           | 31                  | YES         | 8.96 $\pm$ 1.96  | 9  | p = 0.84               | p = 0.24                    | p = 0.27                    |
|                           |                     | NO          | 13.51 $\pm$ 2.72 | 5  |                        | cond. R <sup>2</sup> = 0.22 |                             |
| <i>H. discoidea</i>       | 34                  | YES         | 13.12 $\pm$ 1.94 | 8  | df = 7.65              | df = 7.44                   | df = 7.65                   |
|                           |                     | NO          | 12.61 $\pm$ 3.06 | 5  | F = 1.98               | F = 0.03                    | F = 0.03                    |
|                           | 31                  | YES         | 16.03 $\pm$ 1.87 | 10 | p = 0.20               | p = 0.87                    | p = 0.88                    |
|                           |                     | NO          | 16.55 $\pm$ 1.55 | 7  |                        | cond. R <sup>2</sup> = 0.20 |                             |

**Table S23.** Maximum relative electron transport rate (rETRmax) during the impact phase.

| Species                   | Maximum temperature | Variability | Mean $\pm$ SE    | n  | Model statistics (MHW) | Model statistics (Var.)     | Model statistics (Var.*MHW) |
|---------------------------|---------------------|-------------|------------------|----|------------------------|-----------------------------|-----------------------------|
| <i>Lithophyllum</i> sp.   | 34                  | YES         | 21.92 $\pm$ 2.66 | 11 | df = 13.28             | df = 13.32                  | df = 13.28                  |
|                           |                     | NO          | 14.80 $\pm$ 3.51 | 7  | F = 2.12               | F = 0.22                    | F = 0.26                    |
|                           | 31                  | YES         | 25.87 $\pm$ 4.43 | 11 | p = 0.17               | p = 0.65                    | p = 0.62                    |
|                           |                     | NO          | 24.17 $\pm$ 5.49 | 6  |                        | cond. R <sup>2</sup> = 0.29 |                             |
| <i>Neogoniolithon</i> sp. | 34                  | YES         | 9.68 $\pm$ 3.94  | 8  | df = 13.48             | df = 15.62                  | df = 15.53                  |
|                           |                     | NO          | 15.66 $\pm$ 4.73 | 6  | F = 5.29               | F = 3.07                    | F = 2.99                    |
|                           | 31                  | YES         | 28.29 $\pm$ 4.66 | 9  | <b>p = 0.04</b>        | p = 0.10                    | p = 0.10                    |
|                           |                     | NO          | 18.37 $\pm$ 3.72 | 7  |                        | cond. R <sup>2</sup> = 0.37 |                             |
| <i>H. opuntia</i>         | 34                  | YES         | 7.56 $\pm$ 1.24  | 10 | df = 13.94             | df = 14.00                  | df = 13.94                  |
|                           |                     | NO          | 5.63 $\pm$ 1.30  | 5  | F = 7.45               | F = 2.90                    | F = 2.78                    |
|                           | 31                  | YES         | 10.16 $\pm$ 1.85 | 11 | <b>p = 0.02</b>        | p = 0.11                    | p = 0.12                    |
|                           |                     | NO          | 17.22 $\pm$ 6.08 | 4  |                        | cond. R <sup>2</sup> = 0.30 |                             |
| <i>H. discoidea</i>       | 34                  | YES         | 15.75 $\pm$ 1.95 | 11 | df = 28.00             | df = 28.00                  | df = 28.00                  |
|                           |                     | NO          | 12.89 $\pm$ 1.40 | 6  | F = 0.05               | F = 2.88                    | F = 2.89                    |
|                           | 31                  | YES         | 12.98 $\pm$ 1.18 | 11 | p = 0.82               | p = 0.10                    | p = 0.10                    |
|                           |                     | NO          | 16.52 $\pm$ 1.72 | 4  |                        | cond. R <sup>2</sup> = 0.09 |                             |

**Table S24.** Maximum relative electron transport rate (rETR<sub>max</sub>) during the recovery phase.

| Species                   | Maximum temperature | Variability | Mean $\pm$ SE    | n  | Model statistics (MHW) | Model statistics (Var.)     | Model statistics (Var.*MHW) |
|---------------------------|---------------------|-------------|------------------|----|------------------------|-----------------------------|-----------------------------|
| <i>Lithophyllum</i> sp.   | 34                  | YES         | 19.19 $\pm$ 1.75 | 9  | df = 27.00             | df = 27.00                  | df = 27.00                  |
|                           |                     | NO          | 15.00 $\pm$ 1.94 | 6  | F = 0.02               | F = 0.01                    | F < 0.01                    |
|                           | 31                  | YES         | 18.87 $\pm$ 2.43 | 10 | p = 0.89               | p = 0.93                    | p = 1.00                    |
|                           |                     | NO          | 14.68 $\pm$ 2.35 | 6  |                        | cond. R <sup>2</sup> = 0.10 |                             |
| <i>Neogoniolithon</i> sp. | 34                  | YES         | 17.63 $\pm$ 6.92 | 3  | df = 9.85              | df = 9.82                   | df = 9.85                   |
|                           |                     | NO          | 24.55 $\pm$ 6.42 | 7  | F = 0.29               | F = 0.34                    | F = 0.33                    |
|                           | 31                  | YES         | 28.60 $\pm$ 4.91 | 9  | p = 0.60               | p = 0.57                    | p = 0.58                    |
|                           |                     | NO          | 21.84 $\pm$ 4.74 | 6  |                        | cond. R <sup>2</sup> = 0.48 |                             |
| <i>H. opuntia</i>         | 34                  | YES         | 9.97 $\pm$ 2.88  | 4  | df = 4.78              | df = 4.81                   | df = 4.78                   |
|                           |                     | NO          | 7.56 $\pm$ 0.81  | 3  | F = 1.01               | F = 1.57                    | F = 1.51                    |
|                           | 31                  | YES         | 10.03 $\pm$ 1.27 | 5  | p = 0.36               | p = 0.27                    | p = 0.28                    |
|                           |                     | NO          | 13.88 $\pm$ 2.79 | 5  |                        | cond. R <sup>2</sup> = 0.55 |                             |
| <i>H. discoidea</i>       | 34                  | YES         | 15.47 $\pm$ 2.37 | 11 | df = 25.00             | df = 25.00                  | df = 25.00                  |
|                           |                     | NO          | 10.79 $\pm$ 1.00 | 3  | F = 1.17               | F = 0.83                    | F = 0.91                    |
|                           | 31                  | YES         | 10.45 $\pm$ 1.20 | 11 | p = 0.29               | p = 0.37                    | p = 0.35                    |
|                           |                     | NO          | 10.47 $\pm$ 0.93 | 4  |                        | cond. R <sup>2</sup> = 0.16 |                             |

**Table S25.** Maximum relative electron transport rate (rETR<sub>max</sub>) during the pre-impact phase in the treatments with peaks in temperature occurring during the day or at night.

| Species                   | Maximum temperature | Variability | Mean $\pm$ SE    | n | Model statistics (MHW) | Model statistics (Var.)     | Model statistics (Var.*MHW) |
|---------------------------|---------------------|-------------|------------------|---|------------------------|-----------------------------|-----------------------------|
| <i>Lithophyllum</i> sp.   | 34                  | DAY         | 18.00 $\pm$ 4.65 | 5 | df = 6.07              | df = 6.02                   | df = 6.07                   |
|                           |                     | NIGHT       | 27.58 $\pm$ 7.98 | 6 | F = 0.22               | F < 0.01                    | F = 0.01                    |
|                           | 31                  | DAY         | 14.55 $\pm$ 4.05 | 4 | p = 0.65               | p = 0.98                    | p = 0.94                    |
|                           |                     | NIGHT       | 19.30 $\pm$ 5.97 | 5 |                        | cond. R <sup>2</sup> = 0.66 |                             |
| <i>Neogoniolithon</i> sp. | 34                  | DAY         | 31.14 $\pm$ 7.90 | 4 | df = 6.37              | df = 6.34                   | df = 6.37                   |
|                           |                     | NIGHT       | 25.47 $\pm$ 5.63 | 4 | F = 1.81               | F = 1.17                    | F = 1.15                    |
|                           | 31                  | DAY         | 10.06 $\pm$ 2.64 | 4 | p = 0.22               | p = 0.32                    | p = 0.32                    |
|                           |                     | NIGHT       | 22.88 $\pm$ 3.39 | 6 |                        | cond. R <sup>2</sup> = 0.75 |                             |
| <i>H. opuntia</i>         | 34                  | DAY         | 10.57 $\pm$ 1.44 | 4 | df = 14.00             | df = 14.00                  | df = 14.00                  |
|                           |                     | NIGHT       | 10.74 $\pm$ 1.41 | 4 | F = 0.86               | F = 1.65                    | F = 1.52                    |
|                           | 31                  | DAY         | 11.22 $\pm$ 3.10 | 4 | p = 0.37               | p = 0.22                    | p = 0.24                    |
|                           |                     | NIGHT       | 6.13 $\pm$ 1.48  | 6 |                        | cond. R <sup>2</sup> = 0.17 |                             |
| <i>H. discoidea</i>       | 34                  | DAY         | 17.76 $\pm$ 4.08 | 5 | df = 12.00             | df = 12.00                  | df = 12.00                  |
|                           |                     | NIGHT       | 10.33 $\pm$ 0.62 | 5 | F = 0.53               | F = 3.16                    | F = 3.30                    |
|                           | 31                  | DAY         | 14.49 $\pm$ 1.33 | 5 | p = 0.48               | p = 0.10                    | p = 0.09                    |
|                           |                     | NIGHT       | 17.58 $\pm$ 3.58 | 5 |                        | cond. R <sup>2</sup> = 0.27 |                             |

**Table S26.** Maximum relative electron transport rate (rETR<sub>max</sub>) during the impact phase in the treatments with peaks in temperature occurring during the day or at night.

| Species                   | Maximum temperature | Variability | Mean $\pm$ SE     | n | Model statistics (MHW) | Model statistics (Var.)     | Model statistics (Var.*MHW) |
|---------------------------|---------------------|-------------|-------------------|---|------------------------|-----------------------------|-----------------------------|
| <i>Lithophyllum</i> sp.   | 34                  | DAY         | 18.55 $\pm$ 1.93  | 5 | df = 7.38              | df = 7.34                   | df = 7.38                   |
|                           |                     | NIGHT       | 24.72 $\pm$ 4.48  | 6 | F = 0.75               | F = 0.98                    | F = 0.98                    |
|                           | 31                  | DAY         | 30.72 $\pm$ 10.52 | 4 | p = 0.41               | p = 0.35                    | p = 0.35                    |
|                           |                     | NIGHT       | 23.09 $\pm$ 4.05  | 5 |                        | cond. R <sup>2</sup> = 0.39 |                             |
| <i>Neogoniolithon</i> sp. | 34                  | DAY         | 3.99 $\pm$ 0.53   | 4 | df = 14.00             | df = 14.00                  | df = 14.00                  |
|                           |                     | NIGHT       | 15.38 $\pm$ 7.10  | 4 | F = 11.68              | F = 4.51                    | F = 4.47                    |
|                           | 31                  | DAY         | 35.56 $\pm$ 7.78  | 4 | <b>p &lt; 0.01</b>     | p = 0.05                    | p = 0.05                    |
|                           |                     | NIGHT       | 22.47 $\pm$ 4.78  | 6 |                        | cond. R <sup>2</sup> = 0.49 |                             |
| <i>H. opuntia</i>         | 34                  | DAY         | 8.54 $\pm$ 1.85   | 4 | df = 7.15              | df = 7.04                   | df = 7.15                   |
|                           |                     | NIGHT       | 6.08 $\pm$ 1.31   | 4 | F = 1.11               | F = 0.83                    | F = 0.84                    |
|                           | 31                  | DAY         | 8.67 $\pm$ 1.40   | 4 | p = 0.33               | p = 0.39                    | p = 0.39                    |
|                           |                     | NIGHT       | 11.39 $\pm$ 3.25  | 6 |                        | cond. R <sup>2</sup> = 0.42 |                             |
| <i>H. discoidea</i>       | 34                  | DAY         | 16.18 $\pm$ 3.39  | 5 | df = 18.00             | df = 18.00                  | df = 18.00                  |
|                           |                     | NIGHT       | 15.24 $\pm$ 1.87  | 5 | F = 1.23               | F = 0.04                    | F = 0.03                    |
|                           | 31                  | DAY         | 13.95 $\pm$ 2.40  | 5 | p = 0.28               | p = 0.84                    | p = 0.86                    |
|                           |                     | NIGHT       | 12.17 $\pm$ 0.98  | 5 |                        | cond. R <sup>2</sup> = 0.08 |                             |

**Table S27.** Maximum relative electron transport rate (rETR<sub>max</sub>) during the recovery phase in the treatments with peaks in temperature occurring during the day or at night.

| Species                   | Maximum temperature | Variability | Mean $\pm$ SE    | n | Model statistics (MHW) | Model statistics (Var.)     | Model statistics (Var.*MHW) |
|---------------------------|---------------------|-------------|------------------|---|------------------------|-----------------------------|-----------------------------|
| <i>Lithophyllum</i> sp.   | 34                  | DAY         | 23.39 $\pm$ 1.91 | 4 | df = 15.00             | df = 15.00                  | df = 15.00                  |
|                           |                     | NIGHT       | 15.82 $\pm$ 1.56 | 5 | F = 0.06               | F = 1.35                    | F = 1.49                    |
|                           | 31                  | DAY         | 19.02 $\pm$ 2.73 | 4 | p = 0.82               | p = 0.26                    | p = 0.24                    |
|                           |                     | NIGHT       | 18.78 $\pm$ 3.84 | 6 |                        | cond. R <sup>2</sup> = 0.15 |                             |
| <i>Neogoniolithon</i> sp. | 34                  | DAY         | 17.63 $\pm$ 6.92 | 3 | df = 9.00              | df = 9.00                   | df = -                      |
|                           |                     | NIGHT       | - $\pm$ -        |   | F = 0.16               | F = 1.79                    | F = -                       |
|                           | 31                  | DAY         | 21.77 $\pm$ 5.37 | 4 | p = 0.70               | p = 0.21                    | p = -                       |
|                           |                     | NIGHT       | 34.07 $\pm$ 7.27 | 5 |                        | cond. R <sup>2</sup> = 0.23 |                             |
| <i>H. opuntia</i>         | 34                  | DAY         | 13.06 $\pm$ 4.79 | 2 | df = 5.00              | df = 5.00                   | df = 5.00                   |
|                           |                     | NIGHT       | 6.87 $\pm$ 2.79  | 2 | F = 0.00               | F = 0.99                    | F = 1.08                    |
|                           | 31                  | DAY         | 10.08 $\pm$ 0.23 | 2 | p = 0.98               | p = 0.37                    | p = 0.35                    |
|                           |                     | NIGHT       | 10.00 $\pm$ 2.32 | 3 |                        | cond. R <sup>2</sup> = 0.20 |                             |
| <i>H. discoidea</i>       | 34                  | DAY         | 14.42 $\pm$ 2.78 | 6 | df = 18.00             | df = 18.00                  | df = 18.00                  |
|                           |                     | NIGHT       | 16.73 $\pm$ 4.32 | 5 | F = 3.49               | F = 0.01                    | F = 0.02                    |
|                           | 31                  | DAY         | 9.63 $\pm$ 1.41  | 5 | p = 0.08               | p = 0.91                    | p = 0.89                    |
|                           |                     | NIGHT       | 11.14 $\pm$ 1.94 | 6 |                        | cond. R <sup>2</sup> = 0.15 |                             |

**Table S28.** Light use efficiency ( $\alpha$ ) during the pre-impact phase.

| Species                   | Maximum temperature | Variability | Mean $\pm$ SE   | n  | Model statistics (MHW) | Model statistics (Var.)     | Model statistics (Var.*MHW) |
|---------------------------|---------------------|-------------|-----------------|----|------------------------|-----------------------------|-----------------------------|
| <i>Lithophyllum</i> sp.   | 34                  | YES         | 0.23 $\pm$ 0.02 | 7  | df = 8.07              | df = 8.14                   | df = 8.07                   |
|                           |                     | NO          | 0.25 $\pm$ 0.02 | 4  | F = 0.08               | F = 0.17                    | F = 0.14                    |
|                           | 31                  | YES         | 0.21 $\pm$ 0.03 | 7  | p = 0.79               | p = 0.69                    | p = 0.72                    |
|                           |                     | NO          | 0.25 $\pm$ 0.02 | 5  |                        | cond. R <sup>2</sup> = 0.54 |                             |
| <i>Neogoniolithon</i> sp. | 34                  | YES         | 0.25 $\pm$ 0.03 | 9  | df = 14.93             | df = 14.79                  | df = 14.93                  |
|                           |                     | NO          | 0.31 $\pm$ 0.05 | 4  | F = 0.76               | F = 3.50                    | F = 3.33                    |
|                           | 31                  | YES         | 0.44 $\pm$ 0.08 | 10 | p = 0.40               | p = 0.08                    | p = 0.09                    |
|                           |                     | NO          | 0.25 $\pm$ 0.03 | 5  |                        | cond. R <sup>2</sup> = 0.35 |                             |
| <i>H. opuntia</i>         | 34                  | YES         | 0.12 $\pm$ 0.01 | 9  | df = 15.66             | df = 15.67                  | df = 15.66                  |
|                           |                     | NO          | 0.15 $\pm$ 0.03 | 4  | F = 1.17               | F = 0.68                    | F = 0.64                    |
|                           | 31                  | YES         | 0.44 $\pm$ 0.20 | 8  | p = 0.30               | p = 0.42                    | p = 0.44                    |
|                           |                     | NO          | 0.20 $\pm$ 0.04 | 4  |                        | cond. R <sup>2</sup> = 0.30 |                             |
| <i>H. discoidea</i>       | 34                  | YES         | 0.17 $\pm$ 0.01 | 7  | df = 22.00             | df = 22.00                  | df = 22.00                  |
|                           |                     | NO          | 0.20 $\pm$ 0.04 | 4  | F = 1.07               | F = 0.92                    | F = 0.92                    |
|                           | 31                  | YES         | 0.22 $\pm$ 0.02 | 8  | p = 0.31               | p = 0.35                    | p = 0.35                    |
|                           |                     | NO          | 0.20 $\pm$ 0.03 | 7  |                        | cond. R <sup>2</sup> = 0.09 |                             |

**Table S29.** Light use efficiency ( $\alpha$ ) during the impact phase.

| Species                   | Maximum temperature | Variability | Mean $\pm$ SE   | n  | Model statistics (MHW) | Model statistics (Var.)     | Model statistics (Var.*MHW) |
|---------------------------|---------------------|-------------|-----------------|----|------------------------|-----------------------------|-----------------------------|
| <i>Lithophyllum</i> sp.   | 34                  | YES         | 0.22 $\pm$ 0.02 | 11 | df = 28.00             | df = 28.00                  | df = 28.00                  |
|                           |                     | NO          | 0.36 $\pm$ 0.08 | 7  | F = 1.18               | F = 3.05                    | F = 3.13                    |
|                           | 31                  | YES         | 0.31 $\pm$ 0.04 | 10 | p = 0.29               | p = 0.06                    | p = 0.06                    |
|                           |                     | NO          | 0.28 $\pm$ 0.03 | 6  |                        | cond. R <sup>2</sup> = 0.21 |                             |
| <i>Neogoniolithon</i> sp. | 34                  | YES         | 0.21 $\pm$ 0.05 | 10 | df = 24.00             | df = 24.00                  | df = 24.00                  |
|                           |                     | NO          | 0.32 $\pm$ 0.08 | 3  | F = 0.04               | F = 0.87                    | F = 0.97                    |
|                           | 31                  | YES         | 0.26 $\pm$ 0.02 | 10 | p = 0.84               | p = 0.36                    | p = 0.34                    |
|                           |                     | NO          | 0.28 $\pm$ 0.02 | 5  |                        | cond. R <sup>2</sup> = 0.10 |                             |
| <i>H. opuntia</i>         | 34                  | YES         | 0.14 $\pm$ 0.02 | 11 | df = 28.00             | df = 28.00                  | df = 28.00                  |
|                           |                     | NO          | 0.18 $\pm$ 0.05 | 5  | F = 1.78               | F = 0.67                    | F = 0.73                    |
|                           | 31                  | YES         | 0.13 $\pm$ 0.02 | 10 | p = 0.19               | p = 0.42                    | p = 0.40                    |
|                           |                     | NO          | 0.13 $\pm$ 0.02 | 6  |                        | cond. R <sup>2</sup> = 0.08 |                             |
| <i>H. discoidea</i>       | 34                  | YES         | 0.20 $\pm$ 0.01 | 11 | df = 7.59              | df = 7.49                   | df = 7.59                   |
|                           |                     | NO          | 0.25 $\pm$ 0.02 | 6  | F = 1.98               | F = 1.54                    | F = 1.32                    |
|                           | 31                  | YES         | 0.23 $\pm$ 0.02 | 9  | p = 0.20               | p = 0.25                    | p = 0.28                    |
|                           |                     | NO          | 0.20 $\pm$ 0.02 | 5  |                        | cond. R <sup>2</sup> = 0.34 |                             |

**Table S30.** Light use efficiency ( $\alpha$ ) during the recovery phase.

| Species                   | Maximum temperature | Variability | Mean $\pm$ SE   | n | Model statistics (MHW) | Model statistics (Var.)     | Model statistics (Var.*MHW) |
|---------------------------|---------------------|-------------|-----------------|---|------------------------|-----------------------------|-----------------------------|
| <i>Lithophyllum</i> sp.   | 34                  | YES         | 0.28 $\pm$ 0.01 | 8 | df = 20.00             | df = 20.00                  | df = 20.00                  |
|                           |                     | NO          | 0.26 $\pm$ 0.01 | 4 | F = 0.28               | F = 0.68                    | F = 0.56                    |
|                           | 31                  | YES         | 0.31 $\pm$ 0.03 | 8 | p = 0.60               | p = 0.42                    | p = 0.46                    |
|                           |                     | NO          | 0.25 $\pm$ 0.03 | 4 |                        | cond. R <sup>2</sup> = 0.16 |                             |
| <i>Neogoniolithon</i> sp. | 34                  | YES         | 0.17 $\pm$ 0.06 | 3 | df = 19.00             | df = 19.00                  | df = 19.00                  |
|                           |                     | NO          | 0.25 $\pm$ 0.04 | 5 | F = 2.34               | F = 0.17                    | F = 0.20                    |
|                           | 31                  | YES         | 0.29 $\pm$ 0.05 | 9 | p = 0.14               | p = 0.68                    | p = 0.66                    |
|                           |                     | NO          | 0.31 $\pm$ 0.06 | 6 |                        | cond. R <sup>2</sup> = 0.11 |                             |
| <i>H. opuntia</i>         | 34                  | YES         | 0.15 $\pm$ 0.07 | 5 | df = 4.78              | df = 4.79                   | df = 4.78                   |
|                           |                     | NO          | 0.16 $\pm$ 0.05 | 3 | F = 0.33               | F = 0.03                    | F = 0.03                    |
|                           | 31                  | YES         | 0.21 $\pm$ 0.07 | 7 | p = 0.59               | p = 0.86                    | p = 0.87                    |
|                           |                     | NO          | 0.20 $\pm$ 0.04 | 6 |                        | cond. R <sup>2</sup> = 0.64 |                             |
| <i>H. discoidea</i>       | 34                  | YES         | 0.22 $\pm$ 0.03 | 9 | df = 7.38              | df = 7.41                   | df = 7.38                   |
|                           |                     | NO          | 0.12 $\pm$ 0.02 | 4 | F = 0.04               | F = 0.68                    | F = 0.82                    |
|                           | 31                  | YES         | 0.18 $\pm$ 0.02 | 8 | p = 0.85               | p = 0.44                    | p = 0.39                    |
|                           |                     | NO          | 0.16 $\pm$ 0.05 | 5 |                        | cond. R <sup>2</sup> = 0.38 |                             |

**Table S31.** Light use efficiency ( $\alpha$ ) during the pre-impact phase in the treatments with peaks in temperature occurring during the day or at night.

| Species                   | Maximum temperature | Variability | Mean $\pm$ SE   | n | Model statistics (MHW) | Model statistics (Var.)     | Model statistics (Var.*MHW) |
|---------------------------|---------------------|-------------|-----------------|---|------------------------|-----------------------------|-----------------------------|
| <i>Lithophyllum</i> sp.   | 34                  | DAY         | 0.25 $\pm$ 0.02 | 4 | df = 4.98              | df = 4.97                   | df = 4.98                   |
|                           |                     | NIGHT       | 0.21 $\pm$ 0.01 | 3 | F = 1.30               | F = 0.58                    | F = 0.61                    |
|                           | 31                  | DAY         | 0.24 $\pm$ 0.01 | 3 | p = 0.31               | p = 0.48                    | p = 0.47                    |
|                           |                     | NIGHT       | 0.19 $\pm$ 0.05 | 4 |                        | cond. R <sup>2</sup> = 0.16 |                             |
| <i>Neogoniolithon</i> sp. | 34                  | DAY         | 0.26 $\pm$ 0.05 | 5 | df = 5.82              | df = 5.83                   | df = 5.82                   |
|                           |                     | NIGHT       | 0.24 $\pm$ 0.02 | 4 | F = 2.28               | F = 0.33                    | F = 0.31                    |
|                           | 31                  | DAY         | 0.59 $\pm$ 0.12 | 5 | p = 0.18               | p = 0.59                    | p = 0.60                    |
|                           |                     | NIGHT       | 0.29 $\pm$ 0.03 | 5 |                        | cond. R <sup>2</sup> = 0.88 |                             |
| <i>H. opuntia</i>         | 34                  | DAY         | 0.12 $\pm$ 0.01 | 4 | df = 5.98              | df = 5.98                   | df = 5.98                   |
|                           |                     | NIGHT       | 0.12 $\pm$ 0.01 | 5 | F = 0.10               | F = 0.40                    | F = 0.36                    |
|                           | 31                  | DAY         | 0.57 $\pm$ 0.30 | 5 | p = 0.77               | p = 0.55                    | p = 0.57                    |
|                           |                     | NIGHT       | 0.21 $\pm$ 0.16 | 3 |                        | cond. R <sup>2</sup> = 0.99 |                             |
| <i>H. discoidea</i>       | 34                  | DAY         | 0.20 $\pm$ 0.02 | 3 | df = 12.00             | df = 12.00                  | df = 12.00                  |
|                           |                     | NIGHT       | 0.15 $\pm$ 0.02 | 4 | F = 4.22               | F = 0.81                    | F = 0.87                    |
|                           | 31                  | DAY         | 0.20 $\pm$ 0.01 | 4 | p = 0.06               | p = 0.39                    | p = 0.37                    |
|                           |                     | NIGHT       | 0.23 $\pm$ 0.03 | 4 |                        | cond. R <sup>2</sup> = 0.29 |                             |

**Table S32.** Light use efficiency ( $\alpha$ ) during the impact phase in the treatments with peaks in temperature occurring during the day or at night.

| Species                   | Maximum temperature | Variability | Mean $\pm$ SE     | n | Model statistics (MHW) | Model statistics (Var.)     | Model statistics (Var.*MHW) |
|---------------------------|---------------------|-------------|-------------------|---|------------------------|-----------------------------|-----------------------------|
| <i>Lithophyllum</i> sp.   | 34                  | DAY         | 0.20 $\pm$ < 0.01 | 5 | df = 17.00             | df = 17.00                  | df = 17.00                  |
|                           |                     | NIGHT       | 0.23 $\pm$ 0.03   | 6 | F = 7.88               | F = 4.51                    | F = 4.32                    |
|                           | 31                  | DAY         | 0.39 $\pm$ 0.09   | 4 | <b>p = 0.01</b>        | <b>p = 0.05</b>             | p = 0.05                    |
|                           |                     | NIGHT       | 0.26 $\pm$ 0.02   | 6 |                        | cond. R <sup>2</sup> = 0.37 |                             |
| <i>Neogoniolithon</i> sp. | 34                  | DAY         | 0.18 $\pm$ 0.07   | 6 | df = 16.00             | df = 16.00                  | df = 16.00                  |
|                           |                     | NIGHT       | 0.24 $\pm$ 0.09   | 4 | F = 1.26               | F = 1.96                    | F = 1.92                    |
|                           | 31                  | DAY         | 0.32 $\pm$ 0.01   | 4 | p = 0.28               | p = 0.18                    | p = 0.18                    |
|                           |                     | NIGHT       | 0.23 $\pm$ 0.02   | 6 |                        | cond. R <sup>2</sup> = 0.14 |                             |
| <i>H. opuntia</i>         | 34                  | DAY         | 0.14 $\pm$ 0.03   | 6 | df = 6.85              | df = 6.82                   | df = 6.85                   |
|                           |                     | NIGHT       | 0.13 $\pm$ 0.02   | 5 | F = 0.04               | F = 0.05                    | F = 0.04                    |
|                           | 31                  | DAY         | 0.13 $\pm$ 0.02   | 4 | p = 0.85               | p = 0.83                    | p = 0.84                    |
|                           |                     | NIGHT       | 0.12 $\pm$ 0.02   | 6 |                        | cond. R <sup>2</sup> = 0.36 |                             |
| <i>H. discoidea</i>       | 34                  | DAY         | 0.22 $\pm$ 0.02   | 5 | df = 7.59              | df = 7.49                   | df = 7.59                   |
|                           |                     | NIGHT       | 0.18 $\pm$ 0.01   | 6 | F = 1.98               | F = 1.54                    | F = 1.32                    |
|                           | 31                  | DAY         | 0.26 $\pm$ 0.03   | 4 | p = 0.20               | p = 0.25                    | p = 0.28                    |
|                           |                     | NIGHT       | 0.21 $\pm$ 0.04   | 5 |                        | cond. R <sup>2</sup> = 0.34 |                             |

**Table S33.** Light use efficiency ( $\alpha$ ) during the recovery phase in the treatments with peaks in temperature occurring during the day or at night.

| Species                   | Maximum temperature | Variability | Mean $\pm$ SE   | n | Model statistics (MHW) | Model statistics (Var.)     | Model statistics (Var.*MHW) |
|---------------------------|---------------------|-------------|-----------------|---|------------------------|-----------------------------|-----------------------------|
| <i>Lithophyllum</i> sp.   | 34                  | DAY         | 0.30 $\pm$ 0.01 | 5 | df = 4.98              | df = 4.97                   | df = 4.98                   |
|                           |                     | NIGHT       | 0.25 $\pm$ 0.02 | 3 | F = 1.30               | F = 0.58                    | F = 0.61                    |
|                           | 31                  | DAY         | 0.31 $\pm$ 0.03 | 4 | p = 0.31               | p = 0.48                    | p = 0.47                    |
|                           |                     | NIGHT       | 0.31 $\pm$ 0.05 | 4 |                        | cond. R <sup>2</sup> = 0.16 |                             |
| <i>Neogoniolithon</i> sp. | 34                  | DAY         | 0.17 $\pm$ 0.06 | 3 | df = 9.00              | df = 9.00                   | df = -                      |
|                           |                     | NIGHT       | - $\pm$ -       |   | F = 2.47               | F = 0.93                    | F = -                       |
|                           | 31                  | DAY         | 0.34 $\pm$ 0.10 | 4 | p = 0.15               | p = 0.36                    | p = -                       |
|                           |                     | NIGHT       | 0.25 $\pm$ 0.04 | 5 |                        | cond. R <sup>2</sup> = 0.19 |                             |
| <i>H. opuntia</i>         | 34                  | DAY         | 0.07 $\pm$ 0.04 | 3 | df = 2.21              | df = 2.24                   | df = 2.21                   |
|                           |                     | NIGHT       | 0.27 $\pm$ 0.15 | 2 | F = 0.10               | F = 0.07                    | F = 0.10                    |
|                           | 31                  | DAY         | 0.16 $\pm$ 0.08 | 3 | p = 0.78               | p = 0.81                    | p = 0.78                    |
|                           |                     | NIGHT       | 0.25 $\pm$ 0.12 | 4 |                        | cond. R <sup>2</sup> = 0.46 |                             |
| <i>H. discoidea</i>       | 34                  | DAY         | 0.20 $\pm$ 0.05 | 5 | df = 3.83              | df = 3.78                   | df = 3.83                   |
|                           |                     | NIGHT       | 0.25 $\pm$ 0.03 | 4 | F = 1.14               | F = 0.02                    | F = 0.01                    |
|                           | 31                  | DAY         | 0.14 $\pm$ 0.01 | 3 | p = 0.35               | p = 0.90                    | p = 0.93                    |
|                           |                     | NIGHT       | 0.20 $\pm$ 0.03 | 5 |                        | cond. R <sup>2</sup> = 0.51 |                             |

**Table S34.** Saturation intensity ( $E_k$ ) during the pre-impact phase.

| Species                   | Maximum temperature | Variability | Mean $\pm$ SE      | n  | Model statistics (MHW) | Model statistics (Var.)     | Model statistics (Var.*MHW) |
|---------------------------|---------------------|-------------|--------------------|----|------------------------|-----------------------------|-----------------------------|
| <i>Lithophyllum</i> sp.   | 34                  | YES         | 90.95 $\pm$ 22.30  | 9  | df = 11.86             | df = 11.86                  | df = 11.86                  |
|                           |                     | NO          | 52.58 $\pm$ 13.67  | 5  | F = 0.64               | F = 2.00                    | F = 2.01                    |
|                           | 31                  | YES         | 62.84 $\pm$ 15.17  | 8  | p = 0.44               | p = 0.18                    | p = 0.18                    |
|                           |                     | NO          | 111.87 $\pm$ 20.80 | 5  |                        | cond. R <sup>2</sup> = 0.62 |                             |
| <i>Neogoniolithon</i> sp. | 34                  | YES         | 101.11 $\pm$ 13.01 | 10 | df = 13.19             | df = 13.22                  | df = 13.19                  |
|                           |                     | NO          | 75.90 $\pm$ 25.85  | 5  | F = 0.07               | F = 3.06                    | F = 2.91                    |
|                           | 31                  | YES         | 51.28 $\pm$ 15.47  | 9  | p = 0.80               | p = 0.10                    | p = 0.11                    |
|                           |                     | NO          | 108.17 $\pm$ 8.56  | 4  |                        | cond. R <sup>2</sup> = 0.80 |                             |
| <i>H. opuntia</i>         | 34                  | YES         | 92.60 $\pm$ 7.11   | 9  | df = 24.00             | df = 24.00                  | df = 24.00                  |
|                           |                     | NO          | 74.22 $\pm$ 31.58  | 5  | F = 0.15               | F = 0.03                    | F = 0.02                    |
|                           | 31                  | YES         | 86.30 $\pm$ 33.57  | 9  | p = 0.71               | p = 0.85                    | p = 0.88                    |
|                           |                     | NO          | 60.00 $\pm$ 17.09  | 5  |                        | cond. R <sup>2</sup> = 0.03 |                             |
| <i>H. discoidea</i>       | 34                  | YES         | 76.77 $\pm$ 8.00   | 7  | df = 11.32             | df = 11.01                  | df = 11.32                  |
|                           |                     | NO          | 73.93 $\pm$ 6.20   | 4  | F = 0.40               | F = 0.02                    | F = 0.01                    |
|                           | 31                  | YES         | 81.15 $\pm$ 3.25   | 8  | p = 0.54               | p = 0.90                    | p = 0.92                    |
|                           |                     | NO          | 77.03 $\pm$ 3.64   | 6  |                        | cond. R <sup>2</sup> = 0.06 |                             |

**Table S35.** Saturation intensity ( $E_k$ ) during the impact phase.

| Species                   | Maximum temperature | Variability | Mean $\pm$ SE      | n  | Model statistics (MHW) | Model statistics (Var.)     | Model statistics (Var.*MHW) |
|---------------------------|---------------------|-------------|--------------------|----|------------------------|-----------------------------|-----------------------------|
| <i>Lithophyllum</i> sp.   | 34                  | YES         | 92.41 $\pm$ 9.15   | 11 | df = 29.00             | df = 29.00                  | df = 29.00                  |
|                           |                     | NO          | 61.35 $\pm$ 20.98  | 7  | F = 0.52               | F = 0.93                    | F = 1.03                    |
|                           | 31                  | YES         | 87.83 $\pm$ 13.71  | 9  | p = 0.47               | p = 0.34                    | p = 0.32                    |
|                           |                     | NO          | 88.72 $\pm$ 22.27  | 6  |                        | cond. R <sup>2</sup> = 0.07 |                             |
| <i>Neogoniolithon</i> sp. | 34                  | YES         | 60.20 $\pm$ 17.77  | 8  | df = 12.60             | df = 12.52                  | df = 12.60                  |
|                           |                     | NO          | 27.08 $\pm$ 15.22  | 5  | F = 5.26               | F = 0.01                    | F = 0.03                    |
|                           | 31                  | YES         | 95.70 $\pm$ 12.45  | 10 | <b>p = 0.04</b>        | p = 0.92                    | p = 0.87                    |
|                           |                     | NO          | 73.78 $\pm$ 8.50   | 5  |                        | cond. R <sup>2</sup> = 0.55 |                             |
| <i>H. opuntia</i>         | 34                  | YES         | 40.12 $\pm$ 5.53   | 8  | df = 22.00             | df = 22.00                  | df = 22.00                  |
|                           |                     | NO          | 28.23 $\pm$ 9.86   | 4  | F = 27.39              | F = 7.05                    | F = 6.64                    |
|                           | 31                  | YES         | 75.17 $\pm$ 10.75  | 10 | <b>p &lt; 0.01</b>     | <b>p = 0.01</b>             | <b>p = 0.02</b>             |
|                           |                     | NO          | 131.25 $\pm$ 25.55 | 4  |                        | cond. R <sup>2</sup> = 0.55 |                             |
| <i>H. discoidea</i>       | 34                  | YES         | 82.63 $\pm$ 4.48   | 10 | df = 26.00             | df = 26.00                  | df = 26.00                  |
|                           |                     | NO          | 52.05 $\pm$ 4.29   | 6  | F = 0.11               | F = 16.47                   | F = 16.96                   |
|                           | 31                  | YES         | 54.15 $\pm$ 6.02   | 10 | p = 0.74               | <b>p &lt; 0.01</b>          | <b>p &lt; 0.01</b>          |
|                           |                     | NO          | 76.28 $\pm$ 10.33  | 4  |                        | cond. R <sup>2</sup> = 0.43 |                             |

**Table S36.** Saturation intensity ( $E_k$ ) during the recovery phase.

| Species                   | Maximum temperature | Variability | Mean $\pm$ SE      | n  | Model statistics (MHW) | Model statistics (Var.)     | Model statistics (Var.*MHW) |
|---------------------------|---------------------|-------------|--------------------|----|------------------------|-----------------------------|-----------------------------|
| <i>Lithophyllum</i> sp.   | 34                  | YES         | 68.18 $\pm$ 12.51  | 10 | df = 27.00             | df = 27.00                  | df = 27.00                  |
|                           |                     | NO          | 45.98 $\pm$ 12.79  | 6  | F = 0.39               | F = 0.26                    | F = 0.32                    |
|                           | 31                  | YES         | 53.40 $\pm$ 8.73   | 9  | p = 0.54               | p = 0.62                    | p = 0.58                    |
|                           |                     | NO          | 45.26 $\pm$ 14.50  | 6  |                        | cond. R <sup>2</sup> = 0.08 |                             |
| <i>Neogoniolithon</i> sp. | 34                  | YES         | 114.31 $\pm$ 33.04 | 3  | df = 13.19             | df = 13.22                  | df = 13.19                  |
|                           |                     | NO          | 85.95 $\pm$ 24.64  | 7  | F = 0.07               | F = 3.06                    | F = 2.91                    |
|                           | 31                  | YES         | 109.67 $\pm$ 16.22 | 9  | p = 0.80               | p = 0.10                    | p = 0.11                    |
|                           |                     | NO          | 83.05 $\pm$ 23.37  | 6  |                        | cond. R <sup>2</sup> = 0.80 |                             |
| <i>H. opuntia</i>         | 34                  | YES         | 81.20 $\pm$ 33.27  | 4  | df = 3.05              | df = 3.06                   | df = 3.05                   |
|                           |                     | NO          | 56.16 $\pm$ 15.47  | 3  | F = 0.00               | F = 0.25                    | F = 0.27                    |
|                           | 31                  | YES         | 70.59 $\pm$ 4.54   | 3  | p = 0.98               | p = 0.65                    | p = 0.64                    |
|                           |                     | NO          | 73.82 $\pm$ 7.00   | 5  |                        | cond. R <sup>2</sup> = 0.70 |                             |
| <i>H. discoidea</i>       | 34                  | YES         | 70.02 $\pm$ 15.59  | 11 | df = 27.00             | df = 27.00                  | df = 27.00                  |
|                           |                     | NO          | 84.99 $\pm$ 26.39  | 5  | F = 0.66               | F = 0.05                    | F = 0.03                    |
|                           | 31                  | YES         | 51.09 $\pm$ 10.73  | 12 | p = 0.42               | p = 0.83                    | p = 0.86                    |
|                           |                     | NO          | 72.82 $\pm$ 6.38   | 3  |                        | cond. R <sup>2</sup> = 0.07 |                             |

**Table S37.** Saturation intensity ( $E_k$ ) during the pre-impact phase in the treatments with peaks in temperature occurring during the day or at night.

| Species                   | Maximum temperature | Variability | Mean $\pm$ SE      | n | Model statistics (MHW) | Model statistics (Var.)     | Model statistics (Var.*MHW) |
|---------------------------|---------------------|-------------|--------------------|---|------------------------|-----------------------------|-----------------------------|
| <i>Lithophyllum</i> sp.   | 34                  | DAY         | 64.89 $\pm$ 18.52  | 5 | df = 6.36              | df = 6.34                   | df = 6.36                   |
|                           |                     | NIGHT       | 123.51 $\pm$ 42.15 | 4 | F = 0.31               | F = 0.00                    | F = 0.00                    |
|                           | 31                  | DAY         | 46.07 $\pm$ 20.38  | 5 | p = 0.59               | p = 1.00                    | p = 0.95                    |
|                           |                     | NIGHT       | 90.80 $\pm$ 11.75  | 3 |                        | cond. R <sup>2</sup> = 0.65 |                             |
| <i>Neogoniolithon</i> sp. | 34                  | DAY         | 109.06 $\pm$ 9.16  | 5 | df = 5.53              | df = 5.52                   | df = 5.53                   |
|                           |                     | NIGHT       | 93.16 $\pm$ 25.43  | 5 | F = 4.75               | F = 3.70                    | F = 3.58                    |
|                           | 31                  | DAY         | 11.75 $\pm$ 3.04   | 4 | p = 0.08               | p = 0.11                    | p = 0.11                    |
|                           |                     | NIGHT       | 82.91 $\pm$ 17.13  | 5 |                        | cond. R <sup>2</sup> = 0.75 |                             |
| <i>H. opuntia</i>         | 34                  | DAY         | 92.08 $\pm$ 11.24  | 4 | df = 14.00             | df = 14.00                  | df = 14.00                  |
|                           |                     | NIGHT       | 93.01 $\pm$ 10.31  | 5 | F = 0.03               | F = 0.01                    | F = 0.01                    |
|                           | 31                  | DAY         | 89.23 $\pm$ 43.87  | 5 | p = 0.86               | p = 0.92                    | p = 0.92                    |
|                           |                     | NIGHT       | 82.64 $\pm$ 59.56  | 4 |                        | cond. R <sup>2</sup> < 0.01 |                             |
| <i>H. discoidea</i>       | 34                  | DAY         | 87.51 $\pm$ 17.55  | 3 | df = 11.00             | df = 11.00                  | df = 11.00                  |
|                           |                     | NIGHT       | 68.71 $\pm$ 4.45   | 4 | F = 0.15               | F = 2.93                    | F = 3.01                    |
|                           | 31                  | DAY         | 76.85 $\pm$ 3.57   | 4 | p = 0.71               | p = 0.12                    | p = 0.11                    |
|                           |                     | NIGHT       | 85.45 $\pm$ 4.94   | 4 |                        | cond. R <sup>2</sup> = 0.20 |                             |

**Table S38.** Saturation intensity ( $E_k$ ) during the impact phase in the treatments with peaks in temperature occurring during the day or at night.

| Species                   | Maximum temperature | Variability | Mean $\pm$ SE      | n | Model statistics (MHW) | Model statistics (Var.)     | Model statistics (Var.*MHW) |
|---------------------------|---------------------|-------------|--------------------|---|------------------------|-----------------------------|-----------------------------|
| <i>Lithophyllum</i> sp.   | 34                  | DAY         | 80.68 $\pm$ 8.78   | 5 | df = 7.98              | df = 7.97                   | df = 7.98                   |
|                           |                     | NIGHT       | 102.18 $\pm$ 14.62 | 6 | F = 0.11               | F = 0.67                    | F = 0.74                    |
|                           | 31                  | DAY         | 94.06 $\pm$ 30.69  | 4 | p = 0.75               | p = 0.44                    | p = 0.42                    |
|                           |                     | NIGHT       | 82.84 $\pm$ 9.87   | 5 |                        | cond. R <sup>2</sup> = 0.22 |                             |
| <i>Neogoniolithon</i> sp. | 34                  | DAY         | 33.45 $\pm$ 9.11   | 4 | df = 5.70              | df = 5.55                   | df = 5.70                   |
|                           |                     | NIGHT       | 86.95 $\pm$ 30.21  | 4 | F = 3.27               | F = 2.64                    | F = 2.73                    |
|                           | 31                  | DAY         | 108.22 $\pm$ 23.84 | 4 | p = 0.12               | p = 0.16                    | p = 0.15                    |
|                           |                     | NIGHT       | 87.35 $\pm$ 14.24  | 6 |                        | cond. R <sup>2</sup> = 0.38 |                             |
| <i>H. opuntia</i>         | 34                  | DAY         | 37.49 $\pm$ 8.90   | 4 | df = 5.68              | df = 5.59                   | df = 5.68                   |
|                           |                     | NIGHT       | 42.75 $\pm$ 7.67   | 4 | F = 5.39               | F = 0.75                    | F = 0.66                    |
|                           | 31                  | DAY         | 59.02 $\pm$ 12.24  | 4 | p = 0.06               | p = 0.42                    | p = 0.45                    |
|                           |                     | NIGHT       | 85.93 $\pm$ 15.13  | 6 |                        | cond. R <sup>2</sup> = 0.44 |                             |
| <i>H. discoidea</i>       | 34                  | DAY         | 82.26 $\pm$ 8.28   | 5 | df = 6.75              | df = 6.65                   | df = 6.75                   |
|                           |                     | NIGHT       | 83.00 $\pm$ 4.66   | 5 | F = 12.28              | F = 0.34                    | F = 0.30                    |
|                           | 31                  | DAY         | 49.30 $\pm$ 10.59  | 5 | <b>p = 0.01</b>        | p = 0.58                    | p = 0.60                    |
|                           |                     | NIGHT       | 59.00 $\pm$ 6.27   | 5 |                        | cond. R <sup>2</sup> = 0.47 |                             |

**Table S39.** Saturation intensity ( $E_k$ ) during the recovery phase in the treatments with peaks in temperature occurring during the day or at night.

| Species                   | Maximum temperature | Variability | Mean $\pm$ SE      | n | Model statistics (MHW) | Model statistics (Var.)     | Model statistics (Var.*MHW) |
|---------------------------|---------------------|-------------|--------------------|---|------------------------|-----------------------------|-----------------------------|
| <i>Lithophyllum</i> sp.   | 34                  | DAY         | 90.84 $\pm$ 13.79  | 5 | df = 15.00             | df = 15.00                  | df = 15.00                  |
|                           |                     | NIGHT       | 45.51 $\pm$ 16.05  | 5 | F = 0.68               | F = 0.76                    | F = 0.95                    |
|                           | 31                  | DAY         | 64.87 $\pm$ 1.33   | 3 | p = 0.42               | p = 0.40                    | p = 0.34                    |
|                           |                     | NIGHT       | 47.66 $\pm$ 12.76  | 6 |                        | cond. R <sup>2</sup> = 0.29 |                             |
| <i>Neogoniolithon</i> sp. | 34                  | DAY         | 114.31 $\pm$ 33.04 | 3 | df = 9.00              | df = 9.00                   | df = -                      |
|                           |                     | NIGHT       | - $\pm$ -          | - | F = 0.56               | F = 1.63                    | F = -                       |
|                           | 31                  | DAY         | 86.36 $\pm$ 33.17  | 4 | p = 0.47               | p = 0.23                    | p = -                       |
|                           |                     | NIGHT       | 128.31 $\pm$ 9.55  | 5 |                        | cond. R <sup>2</sup> = 0.13 |                             |
| <i>H. opuntia</i>         | 34                  | DAY         | 116.49 $\pm$ 53.11 | 2 | df = 0.97              | df = 1.19                   | df = -                      |
|                           |                     | NIGHT       | 45.92 $\pm$ 36.54  | 2 | F = 0.22               | F = 1.56                    | F = -                       |
|                           | 31                  | DAY         | - $\pm$ -          | - | p = 0.72               | p = 0.40                    | p = -                       |
|                           |                     | NIGHT       | 70.59 $\pm$ 4.54   | 3 |                        | cond. R <sup>2</sup> = 0.57 |                             |
| <i>H. discoidea</i>       | 34                  | DAY         | 81.90 $\pm$ 27.05  | 6 | df = 19.00             | df = 19.00                  | df = 19.00                  |
|                           |                     | NIGHT       | 55.76 $\pm$ 12.11  | 5 | F = 0.89               | F = 0.65                    | F = 0.69                    |
|                           | 31                  | DAY         | 47.67 $\pm$ 18.53  | 5 | p = 0.36               | p = 0.43                    | p = 0.42                    |
|                           |                     | NIGHT       | 53.54 $\pm$ 14.01  | 7 |                        | cond. R <sup>2</sup> = 0.08 |                             |

**Table S40.** Magnesium content (%mol Mg) during the impact phase.

| Species                   | Maximum temperature | Variability | Mean $\pm$ SE    | n | Model statistics (MHW) | Model statistics (Var.)     | Model statistics (Var.*MHW) |
|---------------------------|---------------------|-------------|------------------|---|------------------------|-----------------------------|-----------------------------|
| <i>Lithophyllum</i> sp.   | 34                  | YES         | 14.23 $\pm$ 0.30 | 9 | df = 8.67              | df = 8.69                   | df = 8.67                   |
|                           |                     | NO          | 13.45 $\pm$ 0.48 | 5 | F = 1.18               | F = 0.01                    | F = 0.02                    |
|                           | 31                  | YES         | 14.59 $\pm$ 0.24 | 9 | p = 0.31               | p = 0.94                    | p = 0.89                    |
|                           |                     | NO          | 14.22 $\pm$ 0.69 | 5 |                        | cond. R <sup>2</sup> = 0.38 |                             |
| <i>Neogoniolithon</i> sp. | 34                  | YES         | 12.04 $\pm$ 0.37 | 9 | df = 24.00             | df = 24.00                  | df = 24.00                  |
|                           |                     | NO          | 12.55 $\pm$ 0.32 | 5 | F = 0.01               | F = 1.34                    | F = 1.12                    |
|                           | 31                  | YES         | 11.50 $\pm$ 0.39 | 8 | p = 0.92               | p = 0.26                    | p = 0.30                    |
|                           |                     | NO          | 12.99 $\pm$ 0.73 | 5 |                        | cond. R <sup>2</sup> = 0.18 |                             |
| <i>H. opuntia</i>         | 34                  | YES         | -                | - | df = -                 | df = -                      | df = -                      |
|                           |                     | NO          | -                | - | F = -                  | F = -                       | F = -                       |
|                           | 31                  | YES         | -                | - | p = -                  | p = -                       | p = -                       |
|                           |                     | NO          | -                | - |                        | cond. R <sup>2</sup> = -    |                             |
| <i>H. discoidea</i>       | 34                  | YES         | -                | - | df = -                 | df = -                      | df = -                      |
|                           |                     | NO          | -                | - | F = -                  | F = -                       | F = -                       |
|                           | 31                  | YES         | -                | - | p = -                  | p = -                       | p = -                       |
|                           |                     | NO          | -                | - |                        | cond. R <sup>2</sup> = -    |                             |

**Table S41.** Magnesium content (%mol Mg) during the impact phase in the treatments with peaks in temperature occurring during the day or at night.

| Species                   | Maximum temperature | Variability | Mean $\pm$ SE    | n | Model statistics (MHW) | Model statistics (Var.)     | Model statistics (Var.*MHW) |
|---------------------------|---------------------|-------------|------------------|---|------------------------|-----------------------------|-----------------------------|
| <i>Lithophyllum</i> sp.   | 34                  | DAY         | 14.18 $\pm$ 0.50 | 5 | df = 13.00             | df = 13.00                  | df = 13.00                  |
|                           |                     | NIGHT       | 14.29 $\pm$ 0.38 | 4 | F = 0.54               | F = 0.08                    | F = 0.07                    |
|                           | 31                  | DAY         | 14.38 $\pm$ 0.31 | 3 | p = 0.47               | p = 0.78                    | p = 0.80                    |
|                           |                     | NIGHT       | 14.72 $\pm$ 0.35 | 5 |                        | cond. R <sup>2</sup> = 0.06 |                             |
| <i>Neogoniolithon</i> sp. | 34                  | DAY         | 12.44 $\pm$ 0.59 | 5 | df = 6.14              | df = 6.10                   | df = 6.14                   |
|                           |                     | NIGHT       | 11.55 $\pm$ 0.33 | 4 | F = 0.19               | F = 0.00                    | F = 0.01                    |
|                           | 31                  | DAY         | 12.01 $\pm$ 0.92 | 3 | p = 0.68               | p = 0.98                    | p = 0.93                    |
|                           |                     | NIGHT       | 11.24 $\pm$ 0.39 | 6 |                        | cond. R <sup>2</sup> = 0.47 |                             |
| <i>H. opuntia</i>         | 34                  | DAY         | -                | - | df = -                 | df = -                      | df = -                      |
|                           |                     | NIGHT       | -                | - | F = -                  | F = -                       | F = -                       |
|                           | 31                  | DAY         | -                | - | p = -                  | p = -                       | p = -                       |
|                           |                     | NIGHT       | -                | - |                        | cond. R <sup>2</sup> = -    |                             |
| <i>H. discoidea</i>       | 34                  | DAY         | -                | - | df = -                 | df = -                      | df = -                      |
|                           |                     | NIGHT       | -                | - | F = -                  | F = -                       | F = -                       |
|                           | 31                  | DAY         | -                | - | p = -                  | p = -                       | p = -                       |
|                           |                     | NIGHT       | -                | - |                        | cond. R <sup>2</sup> = -    |                             |

**Table S42.** Residual Full-Width-Half-Maximum (FWHM) during the impact phase.

| Species                   | Maximum temperature | Variability | Mean $\pm$ SE   | n | Model statistics (MHW) | Model statistics (Var.)     | Model statistics (Var.*MHW) |
|---------------------------|---------------------|-------------|-----------------|---|------------------------|-----------------------------|-----------------------------|
| <i>Lithophyllum</i> sp.   | 34                  | YES         | 1.02 $\pm$ 0.05 | 7 | df = 7.31              | df = 7.31                   | df = 7.31                   |
|                           |                     | NO          | 1.23 $\pm$ 0.06 | 5 | F = 22.87              | F = 3.47                    | F = 3.61                    |
|                           | 31                  | YES         | 0.82 $\pm$ 0.06 | 9 | <b>p &lt; 0.01</b>     | p = 0.10                    | p = 0.10                    |
|                           |                     | NO          | 0.72 $\pm$ 0.06 | 4 |                        | cond. R <sup>2</sup> = 0.75 |                             |
| <i>Neogoniolithon</i> sp. | 34                  | YES         | 0.66 $\pm$ 0.06 | 9 | df = 13.30             | df = 13.29                  | df = 13.30                  |
|                           |                     | NO          | 0.52 $\pm$ 0.17 | 4 | F = 0.02               | F = 0.95                    | F = 1.00                    |
|                           | 31                  | YES         | 0.58 $\pm$ 0.07 | 7 | p = 0.90               | p = 0.35                    | p = 0.33                    |
|                           |                     | NO          | 0.64 $\pm$ 0.08 | 4 |                        | cond. R <sup>2</sup> = 0.36 |                             |
| <i>H. opuntia</i>         | 34                  | YES         |                 |   | df = -                 | df = -                      | df = -                      |
|                           |                     | NO          |                 |   | F = -                  | F = -                       | F = -                       |
|                           | 31                  | YES         |                 |   | p = -                  | p = -                       | p = -                       |
|                           |                     | NO          |                 |   |                        | cond. R <sup>2</sup> = -    |                             |
| <i>H. discoidea</i>       | 34                  | YES         |                 |   | df = -                 | df = -                      | df = -                      |
|                           |                     | NO          |                 |   | F = -                  | F = -                       | F = -                       |
|                           | 31                  | YES         |                 |   | p = -                  | p = -                       | p = -                       |
|                           |                     | NO          |                 |   |                        | cond. R <sup>2</sup> = -    |                             |

**Table S43.** Residual Full-Width-Half-Maximum (FWHM) during the recovery phase in the treatments with peaks in temperature occurring during the day or at night.

| Species                   | Maximum temperature | Variability | Mean $\pm$ SE   | n | Model statistics (MHW) | Model statistics (Var.)     | Model statistics (Var.*MHW) |
|---------------------------|---------------------|-------------|-----------------|---|------------------------|-----------------------------|-----------------------------|
| <i>Lithophyllum</i> sp.   | 34                  | DAY         | 1.01 $\pm$ 0.07 | 5 | df = 4.00              | df = 4.02                   | df = 4.00                   |
|                           |                     | NIGHT       | 1.03 $\pm$ 0.09 | 4 | F = 7.01               | F = 1.27                    | F = 1.16                    |
|                           | 31                  | DAY         | 0.71 $\pm$ 0.07 | 3 | p = 0.06               | p = 0.32                    | p = 0.34                    |
|                           |                     | NIGHT       | 0.90 $\pm$ 0.06 | 5 |                        | cond. R <sup>2</sup> = 0.52 |                             |
| <i>Neogoniolithon</i> sp. | 34                  | DAY         | 0.64 $\pm$ 0.08 | 5 | df = 12.00             | df = 12.00                  | df = 12.00                  |
|                           |                     | NIGHT       | 0.69 $\pm$ 0.08 | 4 | F = 0.55               | F = 0.22                    | F = 0.22                    |
|                           | 31                  | DAY         | 0.61 $\pm$ 0.10 | 3 | p = 0.47               | p = 0.65                    | p = 0.65                    |
|                           |                     | NIGHT       | 0.57 $\pm$ 0.09 | 6 |                        | cond. R <sup>2</sup> = 0.06 |                             |
| <i>H. opuntia</i>         | 34                  | DAY         | -               | - | df = -                 | df = -                      | df = -                      |
|                           |                     | NIGHT       | -               | - | F = -                  | F = -                       | F = -                       |
|                           | 31                  | DAY         | -               | - | p = -                  | p = -                       | p = -                       |
|                           |                     | NIGHT       | -               | - |                        | cond. R <sup>2</sup> = -    |                             |
| <i>H. discoidea</i>       | 34                  | DAY         | -               | - | df = -                 | df = -                      | df = -                      |
|                           |                     | NIGHT       | -               | - | F = -                  | F = -                       | F = -                       |
|                           | 31                  | DAY         | -               | - | p = -                  | p = -                       | p = -                       |
|                           |                     | NIGHT       | -               | - |                        | cond. R <sup>2</sup> = -    |                             |
